# Supplementary material
Source: Research Square preprint supplement (doi:10.21203/rs.3.rs-9052348/v1)

## Multimorbidity in people diagnosed and living with cancer: A cross-sectional study of four common cancers using primary care data

### Contents

|                                                                                                                                                                          |    |
|--------------------------------------------------------------------------------------------------------------------------------------------------------------------------|----|
| Supplementary Table S1: Crude and age-sex standardised prevalence of individual long-term conditions in people newly diagnosed with cancer .....                         | 3  |
| Supplementary Table S2: Crude and age-sex standardised prevalence of individual long-term conditions in people living with and beyond cancer .....                       | 5  |
| Supplementary Table S3: Condition counts in people with incident breast cancer by patient demographics .....                                                             | 7  |
| Supplementary Table S4: Condition counts in men with incident prostate cancer by patient demographics .....                                                              | 8  |
| Supplementary Table S5: Condition counts in people with incident colorectal cancer by patient demographics.....                                                          | 9  |
| Supplementary Table S6: Condition counts in people with incident lung cancer by patient demographics .....                                                               | 10 |
| Supplementary Table S7: Condition counts in people living with and beyond breast cancer by patient demographics.....                                                     | 11 |
| Supplementary Table S8: Condition counts in people living with and beyond prostate cancer by patient demographics.....                                                   | 12 |
| Supplementary Table S9: Condition counts in people living with and beyond colorectal cancer by patient demographics .....                                                | 13 |
| Supplementary Table S10: Condition counts in people living with and beyond lung cancer by patient demographics .....                                                     | 14 |
| Supplementary Table S11: Multimorbidity and Mental-physical Multimorbidity in Incident and PLWBC stratified by sociodemographic groups .....                             | 15 |
| Supplementary Table S12: Logistic regression model of unadjusted and adjusted odds of multimorbidity prevalence in women newly diagnosed with one of three cancers ..... | 16 |
| Supplementary Table S13: Logistic regression model of unadjusted and fully adjusted odds of multimorbidity in women living with one of three cancers .....               | 16 |

|                                                                                                                                                                                     |    |
|-------------------------------------------------------------------------------------------------------------------------------------------------------------------------------------|----|
| Supplementary Table S14: Logistic regression model of unadjusted and fully adjusted odds of multimorbidity in men newly diagnosed with one of four cancers .....                    | 17 |
| Supplementary Table S15: Logistic regression model of unadjusted and fully adjusted odds of multimorbidity in men living with one of four cancers .....                             | 18 |
| Supplementary Table S16: Logistic regression model of unadjusted and fully adjusted odds of mental-physical multimorbidity in women newly diagnosed with one of three cancers ..... | 19 |
| Supplementary Table S17: Logistic regression model of unadjusted and fully adjusted odds of mental-physical multimorbidity in women living with one of three cancers .....          | 19 |
| Supplementary Table S18: Logistic regression model of unadjusted and fully adjusted odds of mental-physical multimorbidity in men newly diagnosed with one of four cancers .....    | 20 |
| Supplementary Table S19: Logistic regression model of unadjusted and fully adjusted odds of mental-physical multimorbidity in men living with one of four cancers .....             | 21 |
| Supplementary Figure S1: Age-sex standardised prevalence (%) of the most common long-term conditions in Incident and People Living with and Beyond Cancer* .....                    | 23 |
| Supplementary Figure S2: Prevalence of mental-physical multimorbidity in the most and least deprived quintiles across age categories .....                                          | 24 |

**Supplementary Table S1: Crude and age-sex standardised prevalence of individual long-term conditions in people newly diagnosed with cancer**

| Incident Cancer Cases          |                          |                  |                  |                  |                                         |                  |                  |                  |
|--------------------------------|--------------------------|------------------|------------------|------------------|-----------------------------------------|------------------|------------------|------------------|
| Comorbidity                    | Crude Prevalence (95%CI) |                  |                  |                  | Age-sex standardised Prevalence (95%CI) |                  |                  |                  |
|                                | Breast                   | Prostate         | Colorectal       | Lung             | Breast                                  | Prostate         | Colorectal       | Lung             |
| Hypertension                   | 37.7 (36.7–38.7)         | 56.2 (55.3–57.2) | 55.0 (53.8–56.1) | 60.3 (59.1–61.5) | 29.8 (27.1–32.5)                        | 32.8 (26.4–39.3) | 26.4 (25.0–27.8) | 28.0 (26.1–29.9) |
| Osteoarthritis                 | 30.0 (29.0–30.9)         | 31.4 (30.5–32.3) | 34.0 (32.9–35.1) | 38.0 (36.8–39.2) | 17.7 (14.2–21.3)                        | 15.1 (13.8–16.4) | 14.4 (13.7–15.2) | 15.7 (14.9–16.6) |
| Anxiety                        | 22.2 (21.3–23.0)         | 12.5 (11.9–13.2) | 17.5 (16.6–18.4) | 20.8 (19.8–21.8) | 21.0 (18.3–23.7)                        | 11.3 (9.2–13.3)  | 17.8 (15.6–20.0) | 19.4 (16.3–22.5) |
| Depression                     | 21.9 (21.1–22.8)         | 12.4 (11.8–13.1) | 17.3 (16.4–18.2) | 23.2 (22.2–24.2) | 13.9 (11.6–16.3)                        | 9.0 (7.6–10.4)   | 17.2 (15.1–19.3) | 20.5 (17.5–23.6) |
| Asthma                         | 15.7 (15.0–16.4)         | 13.3 (12.6–13.9) | 15.9 (15.0–16.7) | 19.7 (18.7–20.7) | 15.0 (11.4–18.5)                        | 16.6 (9.5–23.6)  | 19.9 (15.9–24.0) | 21.2 (16.8–25.5) |
| Thyroid disease                | 12.6 (11.9–13.3)         | 4.6 (4.2–5.0)    | 9.4 (8.7–10.1)   | 11.1 (10.4–11.9) | 7.9 (5.3–10.5)                          | 2.1 (1.8–2.3)    | 6.6 (4.5–8.8)    | 5.7 (4.6–6.8)    |
| Diabetes                       | 11.9 (11.3–12.6)         | 17.8 (17.1–18.6) | 20.4 (19.4–21.3) | 22.4 (21.3–23.4) | 12.6 (9.1–16.1)                         | 9.1 (8.4–9.9)    | 11.1 (10.0–12.2) | 11.2 (8.8–13.6)  |
| Deafness                       | 11.4 (10.8–12.1)         | 20.1 (19.3–20.9) | 17.3 (16.4–18.2) | 20.1 (19.1–21.1) | 10.1 (7.2–13.0)                         | 9.8 (8.5–11.0)   | 8.5 (7.4–9.6)    | 9.0 (7.7–10.3)   |
| Osteoporosis                   | 9.1 (8.5–9.6)            | 3.2 (2.8–3.5)    | 8.9 (8.3–9.6)    | 12.7 (11.9–13.6) | 4.4 (2.8–5.9)                           | 1.2 (1.1–1.3)    | 3.3 (3.0–3.6)    | 5.4 (4.5–6.2)    |
| Coronary heart disease         | 8.9 (8.3–9.5)            | 20.4 (19.6–21.2) | 19.3 (18.4–20.2) | 26.2 (25.1–27.3) | 12.3 (7.7–16.8)                         | 8.5 (8.0–9.0)    | 9.9 (7.2–12.7)   | 10.2 (9.5–10.9)  |
| Chronic kidney disease         | 8.6 (8.0–9.1)            | 12.9 (12.2–13.5) | 16.1 (15.2–16.9) | 17.5 (16.6–18.4) | 6.2 (3.4–9.0)                           | 4.7 (4.4–4.9)    | 4.9 (4.5–5.2)    | 5.7 (4.7–6.6)    |
| Arrhythmia                     | 7.1 (6.6–7.6)            | 13.0 (12.3–13.6) | 15.4 (14.6–16.2) | 17.2 (16.3–18.1) | 5.1 (3.2–7.0)                           | 5.2 (4.8–5.6)    | 5.1 (4.7–5.5)    | 6.4 (5.3–7.5)    |
| COPD                           | 6.2 (5.7–6.7)            | 9.7 (9.1–10.3)   | 11.8 (11.0–12.5) | 39.1 (37.9–40.3) | 5.9 (3.0–8.7)                           | 4.0 (3.6–4.3)    | 5.0 (4.6–5.5)    | 19.2 (17.7–20.8) |
| Connective tissue disease      | 5.0 (4.5–5.4)            | 5.0 (4.6–5.4)    | 5.9 (5.4–6.5)    | 8.5 (7.8–9.2)    | 2.9 (1.7–4.1)                           | 2.7 (2.2–3.2)    | 3.4 (2.7–4.1)    | 3.7 (3.3–4.2)    |
| Alcohol misuse                 | 4.7 (4.3–5.1)            | 7.6 (7.1–8.1)    | 7.4 (6.8–8.0)    | 11.1 (10.3–11.9) | 7.4 (4.4–10.4)                          | 9.8 (4.9–14.6)   | 6.8 (5.8–7.9)    | 9.4 (8.1–10.7)   |
| Stroke or TIA                  | 4.6 (4.2–5.0)            | 7.5 (7.0–8.0)    | 8.2 (7.6–8.9)    | 11.4 (10.6–12.1) | 3.8 (2.2–5.4)                           | 3.0 (2.7–3.2)    | 3.5 (2.9–4.1)    | 4.3 (3.9–4.8)    |
| Peripheral neuropathy          | 4.0 (3.6–4.3)            | 5.6 (5.1–6.0)    | 5.5 (5.0–6.0)    | 7.2(6.6-7.9)     | 5.1 (2.3-7.8)                           | 2.9 (2.5-3.4)    | 3.0 (2.5-3.4)    | 4.4 (3.6-5.2)    |
| Venous thromboembolism         | 3.9 (3.5–4.3)            | 4.8 (4.3–5.2)    | 5.9 (5.4–6.5)    | 7.3 (6.7–8.0)    | 1.8 (1.2–2.4)                           | 2.3 (1.9–2.7)    | 3.5 (2.7–4.4)    | 5.9 (3.4–8.5)    |
| Endometriosis                  | 3.5 (3.2–3.9)            | 0.0 (0.0–0.0)    | 1.0 (0.7–1.2)    | 1.1 (0.8–1.3)    | 2.0 (1.6–2.4)                           | 0.0 (0.0–0.0)    | 2.4 (0.9–3.9)    | 2.0 (1.0–2.9)    |
| Heart failure                  | 3.4 (3.0–3.8)            | 6.5 (6.0–6.9)    | 8.0 (7.3–8.6)    | 11.4 (10.6–12.2) | 4.9 (2.2–7.6)                           | 7.0 (0.8–13.2)   | 2.7 (2.4–3.1)    | 4.2 (3.5–4.8)    |
| Heart valve disorder           | 3.2 (2.8–3.5)            | 5.5 (5.0–5.9)    | 6.4 (5.8–6.9)    | 7.7 (7.0–8.4)    | 3.0 (1.6–4.4)                           | 6.9 (0.7–13.1)   | 2.3 (2.0–2.7)    | 3.3 (2.4–4.2)    |
| Post traumatic stress disorder | 2.9 (2.5–3.2)            | 1.6 (1.4–1.9)    | 2.2 (1.8–2.5)    | 2.8 (2.4–3.2)    | 1.2 (1.0–1.4)                           | 1.4 (1.0–1.9)    | 2.6 (1.2–4.0)    | 2.7 (1.5–3.8)    |
| Peptic ulcer disease           | 2.9 (2.5–3.2)            | 6.4 (5.9–6.9)    | 6.2 (5.7–6.8)    | 9.6 (8.9–10.3)   | 5.5 (2.6–8.3)                           | 2.8 (2.5–3.0)    | 4.1 (2.0–6.1)    | 8.9 (7.7–10.1)   |
| Gout                           | 2.6 (2.3–3.0)            | 12.7 (12.0–13.3) | 9.4 (8.7–10.1)   | 8.9 (8.2–9.6)    | 6.6 (3.4–9.9)                           | 6.5 (5.3–7.7)    | 3.9 (3.5–4.4)    | 3.9 (3.0–4.8)    |
| Addisons disease               | 2.4 (2.1–2.7)            | 1.1 (0.9–1.3)    | 1.9 (1.6–2.3)    | 1.9 (1.6–2.3)    | 0.8 (0.7–0.9)                           | 0.6 (0.3–0.8)    | 0.9 (0.7–1.1)    | 0.8 (0.6–0.9)    |
| Dementia                       | 2.3 (2.0–2.6)            | 2.4 (2.1–2.7)    | 3.4 (3.0–3.8)    | 4.7 (4.2–5.3)    | 1.7 (1.1–2.4)                           | 0.9 (0.7–1.0)    | 0.9 (0.8–1.0)    | 1.3 (1.1–1.4)    |

|                             |               |               |               |                 |                 |                 |                |               |
|-----------------------------|---------------|---------------|---------------|-----------------|-----------------|-----------------|----------------|---------------|
| Liver disease               | 2.1 (1.8–2.4) | 2.4 (2.1–2.7) | 3.0 (2.6–3.4) | 4.5 (4.0–5.0)   | 2.8 (1.2–4.4)   | 1.6 (1.2–2.0)   | 2.7 (1.9–3.5)  | 3.7 (2.4–5.0) |
| Epilepsy                    | 1.7 (1.4–1.9) | 2.0 (1.7–2.3) | 2.4 (2.1–2.8) | 3.0 (2.6–3.4)   | 2.7 (0.5–4.9)   | 5.9 (-0.8–12.6) | 2.6 (1.7–3.4)  | 3.8 (1.5–6.2) |
| Peripheral arterial disease | 1.7 (1.4–1.9) | 3.9 (3.5–4.3) | 3.9 (3.4–4.3) | 10.5 (9.7–11.2) | 3.4 (1.0–5.7)   | 1.5 (1.3–1.6)   | 1.5 (1.2–1.7)  | 4.3 (3.5–5.1) |
| Blindness                   | 1.5 (1.3–1.8) | 1.7 (1.5–2.0) | 2.0 (1.7–2.4) | 3.0 (2.6–3.5)   | 1.3 (0.5–2.2)   | 0.7 (0.6–0.8)   | 0.8 (0.6–1.1)  | 1.0 (0.8–1.2) |
| Inflammatory bowel disease  | 1.4 (1.2–1.6) | 1.5 (1.3–1.8) | 2.5 (2.2–2.9) | 1.8 (1.5–2.1)   | 3.2 (-0.2–6.6)  | 0.9 (0.6–1.1)   | 7.8 (4.0–11.6) | 1.0 (0.7–1.2) |
| Bronchiectasis              | 1.3 (1.1–1.6) | 1.7 (1.4–1.9) | 2.4 (2.0–2.7) | 3.1 (2.7–3.5)   | 0.6 (0.3–0.8)   | 0.8 (0.5–1.0)   | 1.2 (0.9–1.6)  | 4.0 (1.1–6.8) |
| Haematological cancer       | 1.2 (0.9–1.4) | 1.9 (1.6–2.2) | 2.5 (2.1–2.8) | 3.1 (2.6–3.5)   | 0.9 (0.3–1.5)   | 0.9 (0.7–1.2)   | 1.6 (1.1–2.0)  | 3.0 (0.7–5.3) |
| Substance misuse            | 1.1 (0.9–1.3) | 1.0 (0.8–1.2) | 1.5 (1.2–1.7) | 2.6 (2.2–3.0)   | 10.3 (6.2–14.5) | 1.1 (0.7–1.4)   | 2.0 (1.3–2.7)  | 5.0 (3.7–6.3) |
| Chronic pancreatitis        | 1.0 (0.8–1.2) | 1.1 (0.9–1.3) | 1.3 (1.0–1.5) | 2.0 (1.7–2.3)   | 1.0 (0.2–1.8)   | 0.6 (0.3–0.8)   | 0.7 (0.5–0.9)  | 1.3 (0.9–1.6) |
| Tuberculosis                | 1.0 (0.8–1.2) | 1.1 (0.9–1.3) | 1.4 (1.1–1.6) | 1.7 (1.4–2.0)   | 0.5 (0.3–0.8)   | 0.5 (0.4–0.7)   | 0.7 (0.5–1.0)  | 1.1 (0.7–1.5) |
| Bipolar affective disorder  | 0.8 (0.6–0.9) | 0.3 (0.2–0.5) | 0.7 (0.5–0.9) | 0.9 (0.6–1.1)   | 0.4 (0.2–0.5)   | 0.1 (0.1–0.2)   | 1.0 (0.4–1.6)  | 1.4 (0.3–2.4) |
| Multiple sclerosis          | 0.6 (0.4–0.7) | 0.2 (0.1–0.3) | 0.3 (0.2–0.5) | 0.4 (0.3–0.6)   | 0.8 (-0.2–1.8)  | 0.2 (0.1–0.2)   | 1.5 (-0.6–3.5) | 0.3 (0.1–0.5) |
| Congenital disease          | 0.5 (0.4–0.7) | 0.3 (0.2–0.5) | 0.8 (0.6–1.0) | 0.8 (0.6–1.0)   | 0.9 (0.2–1.6)   | 0.4 (0.1–0.6)   | 1.3 (0.5–2.0)  | 1.6 (0.5–2.7) |
| Parkinsons disease          | 0.5 (0.4–0.7) | 0.9 (0.7–1.1) | 1.0 (0.8–1.2) | 0.8 (0.5–1.0)   | 0.6 (-0.2–1.4)  | 0.3 (0.3–0.4)   | 0.3 (0.2–0.4)  | 0.2 (0.2–0.3) |
| Schizophrenia               | 0.5 (0.4–0.7) | 0.2 (0.1–0.3) | 0.4 (0.3–0.6) | 0.9 (0.7–1.1)   | 0.8 (-0.3–1.8)  | 0.1 (0.0–0.2)   | 0.2 (0.1–0.4)  | 1.3 (0.5–2.1) |
| Eating disorders            | 0.5 (0.4–0.6) | 0.0 (0.0–0.1) | 0.1 (0.0–0.2) | 0.1 (0.0–0.2)   | 0.4 (0.2–0.6)   | 0.0 (0.0–0.0)   | 0.2 (0.1–0.4)  | 0.3 (0.0–0.6) |
| Aortic aneurysm             | 0.4 (0.2–0.5) | 2.0 (1.7–2.2) | 1.5 (1.3–1.8) | 4.2 (3.7–4.7)   | 0.9 (0.2–1.5)   | 0.7 (0–0.8)     | 0.5 (0.4–0.6)  | 1.2 (1.0–1.3) |
| Autism                      | 0.1 (0.0–0.1) | 0.1 (0.0–0.1) | 0.1 (0.0–0.2) | 0.0 (0.0–0.0)   | 4.2 (4.2–4.2)   | 0.1 (0.0–0.1)   | 0.2 (0.0–0.4)  | 0.0 (0.0–0.0) |
| Cystic fibrosis             | 0.0 (0.0–0.1) | 0.0 (0.0–0.0) | 0.0 (0.0–0.1) | 0.0 (0.0–0.1)   | 0.0 (0.0–0.1)   | 0.0 (0.0–0.0)   | 0.1 (0.0–0.2)  | 0.0 (0.0–0.1) |
| HIV                         | 0.0 (0.0–0.1) | 0.0 (0.0–0.1) | 0.1 (0.0–0.2) | 0.1 (0.0–0.1)   | 2.5 (-0.9–5.8)  | 0.0 (0.0–0.0)   | 0.2 (0.0–0.5)  | 0.1 (0.0–0.2) |

COPD: chronic obstructive pulmonary disease; TIA: transient ischaemic attack; HIV: Human Immunodeficiency Virus

**Supplementary Table S2: Crude and age-sex standardised prevalence of individual long-term conditions in people living with and beyond cancer**

| PLWBC                          |                          |                  |                  |                  |                                         |                  |                  |                  |
|--------------------------------|--------------------------|------------------|------------------|------------------|-----------------------------------------|------------------|------------------|------------------|
| Comorbidity                    | Crude Prevalence (95%CI) |                  |                  |                  | Age-sex standardised Prevalence (95%CI) |                  |                  |                  |
|                                | Breast                   | Prostate         | Colorectal       | Lung             | Breast                                  | Prostate         | Colorectal       | Lung             |
| Hypertension                   | 41.9 (40.7–43.0)         | 61.8 (60.5–63.1) | 59.1 (57.4–60.8) | 64.9 (61.5–68.4) | 34.4 (29.1–39.8)                        | 29.6 (28.0–31.2) | 27.7 (25.5–29.9) | 32.5 (29.4–35.5) |
| Osteoarthritis                 | 33.2 (32.2–34.3)         | 37.6 (36.3–38.9) | 36.6 (34.9–38.3) | 41.3 (37.7–44.8) | 18.0 (13.4–22.5)                        | 16.9 (15.5–18.2) | 15.7 (14.4–16.9) | 19.3 (16.8–21.8) |
| Anxiety                        | 25.0 (24.0–26.0)         | 14.0 (13.1–14.9) | 20.2 (18.8–21.6) | 22.8 (19.8–25.9) | 20.5 (18.0–23.1)                        | 14.8 (6.9–22.6)  | 21.3 (18.2–24.5) | 21.7 (17.3–26.1) |
| Depression                     | 24.1 (23.1–25.1)         | 13.8 (12.9–14.7) | 19.2 (17.9–20.6) | 26.1 (22.9–29.3) | 18.1 (14.4–21.8)                        | 22.6 (18.9–26.4) | 19.2 (16.2–22.3) | 20.6 (15.7–25.4) |
| Asthma                         | 16.9 (16.1–17.8)         | 13.4 (12.5–14.3) | 16.4 (15.1–17.7) | 28.2 (24.9–31.5) | 16.3 (13.8–18.8)                        | 12.6 (5.3–20.0)  | 17.5 (13.7–21.2) | 27.4 (21.9–32.9) |
| Osteoporosis                   | 16.0 (15.2–16.9)         | 5.4 (4.8–6.0)    | 10.8 (9.7–11.9)  | 14.4 (11.9–17.0) | 6.1 (5.0–7.1)                           | 1.9 (1.6–2.2)    | 4.4 (3.7–5.2)    | 6.7 (5.1–8.3)    |
| Thyroid disease                | 14.1 (13.3–14.9)         | 5.5 (4.9–6.1)    | 9.8 (8.7–10.8)   | 13.2 (10.7–15.7) | 7.7 (5.4–10.0)                          | 2.2 (1.9–2.6)    | 6.3 (5.0–7.5)    | 8.2 (5.7–10.7)   |
| Diabetes                       | 13.0 (12.3–13.8)         | 20.0 (18.9–21.0) | 22.2 (20.7–23.6) | 21.0 (18.1–24.0) | 12.6 (8.3–16.8)                         | 12.0 (9.0–15.0)  | 11.7 (10.2–13.1) | 11.5 (9.1–13.9)  |
| Deafness                       | 12.3 (11.5–13.0)         | 22.7 (21.6–23.8) | 19.1 (17.8–20.5) | 19.8 (16.9–22.7) | 7.6 (5.1–10.1)                          | 14.4 (7.6–21.3)  | 8.8 (7.1–10.6)   | 8.8 (7.0–10.6)   |
| Coronary heart disease         | 9.6 (9.0–10.3)           | 23.9 (22.8–25.0) | 21.7 (20.3–23.2) | 30.0 (26.7–33.3) | 7.6 (4.9–10.2)                          | 9.3 (8.6–10.0)   | 11.2 (9.0–13.4)  | 14.4 (12.2–16.6) |
| Chronic kidney disease         | 9.4 (8.7–10.0)           | 15.8 (14.8–16.7) | 18.0 (16.6–19.3) | 18.7 (15.9–21.5) | 5.0 (3.4–6.5)                           | 5.3 (4.8–5.9)    | 5.8 (5.1–6.4)    | 7.8 (6.2–9.4)    |
| Arrhythmia                     | 8.0 (7.4–8.7)            | 17.4 (16.4–18.4) | 17.1 (15.8–18.5) | 22.0 (19.0–25.0) | 5.3 (3.8–6.8)                           | 6.0 (5.5–6.6)    | 6.1 (5.3–6.9)    | 10.6 (7.7–13.4)  |
| COPD                           | 6.8 (6.2–7.4)            | 11.7 (10.9–12.6) | 12.1 (11.0–13.3) | 51.7 (48.1–55.4) | 3.9 (1.2–6.6)                           | 4.7 (4.0–5.3)    | 5.2 (4.5–6.0)    | 29.9 (25.9–34.0) |
| Venous thromboembolism         | 6.3 (5.8–6.9)            | 5.9 (5.3–6.5)    | 10.6 (9.5–11.7)  | 13.5 (11.0–16.0) | 4.2 (2.9–5.5)                           | 2.9 (2.2–3.6)    | 8.8 (5.8–11.8)   | 10.6 (7.0–14.2)  |
| Peripheral neuropathy          | 5.4 (4.9–5.9)            | 6.6 (5.9–7.2)    | 9.1 (8.1–10.1)   | 9.8 (7.6–11.9)   | 6.1 (3.6–8.6)                           | 8.0 (1.2–14.8)   | 8.5 (6.2–10.9)   | 6.8 (4.0–9.6)    |
| Connective tissue disease      | 5.5 (5.0–6.0)            | 6.0 (5.3–6.6)    | 6.7 (5.8–7.5)    | 9.6 (7.5–11.8)   | 3.3 (2.1–4.6)                           | 2.6 (2.0–3.2)    | 3.2 (2.5–3.9)    | 5.5 (3.0–8.0)    |
| Stroke or TIA                  | 4.5 (4.0–5.0)            | 9.3 (8.6–10.1)   | 8.3 (7.3–9.2)    | 11.1 (8.9–13.4)  | 4.4 (1.5–7.3)                           | 3.4 (3.0–3.8)    | 3.0 (2.4–3.6)    | 4.8 (3.3–6.3)    |
| Alcohol misuse                 | 4.3 (3.8–4.7)            | 6.9 (6.2–7.5)    | 6.8 (5.9–7.7)    | 12.2 (9.9–14.6)  | 5.1 (2.1–8.1)                           | 11.2 (3.3–19.0)  | 6.1 (4.2–7.9)    | 7.8 (5.3–10.3)   |
| Heart failure                  | 3.7 (3.3–4.2)            | 8.3 (7.6–9.0)    | 8.8 (7.8–9.7)    | 10.7 (8.5–13.0)  | 2.7 (1.4–4.1)                           | 3.0 (2.5–3.5)    | 2.7 (2.2–3.3)    | 4.6 (3.5–5.7)    |
| Heart valve disorder           | 3.7 (3.3–4.1)            | 6.6 (6.0–7.3)    | 7.4 (6.5–8.4)    | 10.2 (8.0–12.4)  | 1.8 (1.0–2.6)                           | 2.3 (2.0–2.6)    | 2.2 (1.9–2.5)    | 4.1 (3.1–5.2)    |
| Endometriosis                  | 3.6 (3.2–4.1)            | 0.0 (0.0–0.0)    | 1.3 (0.9–1.7)    | 1.0 (0.3–1.7)    | 1.9 (1.6–2.2)                           | 0.0 (0.0–0.0)    | 1.9 (1.0–2.8)    | 4.9 (4.6–5.2)    |
| Peptic ulcer disease           | 3.3 (2.9–3.8)            | 7.4 (6.7–8.1)    | 7.6 (6.7–8.5)    | 9.4 (7.2–11.5)   | 2.5 (0.5–4.5)                           | 9.0 (1.6–16.3)   | 4.4 (3.2–5.7)    | 6.0 (3.9–8.1)    |
| Gout                           | 3.0 (2.6–3.4)            | 13.7 (12.8–14.6) | 9.7 (8.6–10.7)   | 9.2 (7.1–11.3)   | 2.2 (0.9–3.5)                           | 7.2 (6.1–8.3)    | 4.5 (3.7–5.3)    | 4.7 (3.0–6.4)    |
| Post traumatic stress disorder | 2.8 (2.4–3.2)            | 1.7 (1.4–2.0)    | 2.1 (1.6–2.6)    | 1.4 (0.5–2.2)    | 3.0 (1.0–5.0)                           | 1.2 (0.6–1.8)    | 1.5 (0.8–2.2)    | 1.1 (0.2–2.0)    |
| Chronic liver disease          | 2.6 (2.2–2.9)            | 2.7 (2.3–3.1)    | 4.0 (3.3–4.7)    | 5.1 (3.5–6.7)    | 4.8 (2.0–7.7)                           | 2.3 (1.5–3.2)    | 3.8 (2.5–5.0)    | 4.6 (2.5–6.7)    |
| Dementia                       | 2.3 (2.0–2.7)            | 4.4 (3.9–5.0)    | 4.0 (3.3–4.7)    | 4.5 (3.0–6.1)    | 1.6 (1.1–2.1)                           | 1.4 (1.2–1.6)    | 1.1 (0.9–1.3)    | 1.7 (1.1–2.3)    |

|                             |               |               |               |                 |                |                 |                |                |
|-----------------------------|---------------|---------------|---------------|-----------------|----------------|-----------------|----------------|----------------|
| Addisons disease            | 2.2 (1.8–2.5) | 1.0 (0.7–1.3) | 2.2 (1.7–2.7) | 3.2 (1.9–4.4)   | 0.8 (0.6–0.9)  | 0.4 (0.2–0.5)   | 1.1 (0.6–1.5)  | 1.1 (0.7–1.6)  |
| Epilepsy                    | 1.8 (1.5–2.1) | 2.3 (1.9–2.7) | 2.2 (1.7–2.7) | 2.9 (1.7–4.1)   | 1.0 (0.6–1.4)  | 1.2 (0.7–1.6)   | 2.7 (1.1–4.4)  | 1.7 (0.6–2.8)  |
| Peripheral arterial disease | 1.8 (1.5–2.1) | 4.4 (3.9–5.0) | 4.8 (4.1–5.6) | 10.6 (8.4–12.8) | 2.2 (0.1–4.4)  | 1.6 (1.4–1.8)   | 1.7 (1.3–2.0)  | 4.2 (3.3–5.2)  |
| Blindness                   | 1.6 (1.3–1.9) | 1.7 (1.3–2.0) | 2.0 (1.5–2.5) | 3.2 (1.9–4.4)   | 2.2 (0.4–4.1)  | 0.5 (0.4–0.7)   | 1.4 (0.1–2.8)  | 1.7 (0.4–2.9)  |
| Inflammatory bowel disease  | 1.4 (1.1–1.7) | 1.7 (1.4–2.0) | 3.1 (2.5–3.7) | 1.9 (0.9–2.9)   | 1.0 (0.4–1.5)  | 0.9 (0.5–1.3)   | 4.7 (2.7–6.6)  | 1.3 (0.3–2.3)  |
| Bronchiectasis              | 1.2 (0.9–1.4) | 1.8 (1.4–2.1) | 2.5 (1.9–3.0) | 5.9 (4.2–7.6)   | 0.4 (0.3–0.4)  | 0.6 (0.5–0.8)   | 0.9 (0.6–1.2)  | 3.0 (1.9–4.0)  |
| Haematological cancer       | 1.2 (0.9–1.4) | 2.3 (1.9–2.7) | 2.9 (2.4–3.5) | 3.6 (2.2–4.9)   | 0.6 (0.4–0.8)  | 1.1 (0.7–1.5)   | 3.2 (1.4–5.0)  | 2.0 (1.0–3.1)  |
| Substance misuse            | 1.1 (0.9–1.3) | 0.9 (0.7–1.1) | 1.4 (1.0–1.8) | 1.9 (0.9–2.9)   | 0.5 (0.4–0.7)  | 6.2 (-1.1–13.5) | 2.2 (0.9–3.6)  | 2.4 (0.5–4.4)  |
| Tuberculosis                | 1.1 (0.8–1.3) | 1.4 (1.1–1.7) | 1.2 (0.8–1.6) | 2.5 (1.3–3.6)   | 0.4 (0.3–0.4)  | 0.6 (0.4–0.8)   | 0.8 (0.3–1.4)  | 3.9 (0.1–7.7)  |
| Chronic pancreatitis        | 1.0 (0.8–1.3) | 1.4 (1.1–1.7) | 1.4 (1.0–1.9) | 2.1 (1.0–3.1)   | 2.1 (-0.6–4.8) | 0.9 (0.4–1.5)   | 1.4 (0.5–2.2)  | 2.9 (0.3–5.5)  |
| Bipolar affective disorder  | 0.8 (0.6–1.0) | 0.3 (0.2–0.4) | 0.5 (0.3–0.7) | 1.0 (0.3–1.7)   | 1.3 (-0.4–2.9) | 0.2 (0.0–0.3)   | 0.4 (0.1–0.6)  | 0.8 (0.0–1.5)  |
| Congenital disease          | 0.6 (0.4–0.8) | 0.4 (0.2–0.5) | 0.6 (0.4–0.9) | 0.1 (-0.1–0.4)  | 0.3 (0.2–0.4)  | 1.7 (-1.0–4.4)  | 1.4 (-0.1–2.8) | 0.0 (0.0–0.1)  |
| Eating disorders            | 0.5 (0.4–0.7) | 0.0 (0.0–0.1) | 0.1 (0.0–0.1) | 0.4 (-0.1–0.9)  | 0.4 (0.2–0.6)  | 0.1 (-0.1–0.2)  | 0.4 (-0.2–0.9) | 0.3 (0.0–0.6)  |
| Schizophrenia               | 0.5 (0.3–0.7) | 0.2 (0.1–0.4) | 0.4 (0.2–0.6) | 0.3 (-0.1–0.7)  | 0.2 (0.1–0.4)  | 0.3 (-0.1–0.7)  | 0.2 (0.1–0.4)  | 0.3 (-0.1–0.8) |
| Multiple sclerosis          | 0.5 (0.3–0.6) | 0.2 (0.1–0.4) | 0.3 (0.1–0.4) | 0.1 (-0.1–0.4)  | 0.3 (0.1–0.4)  | 0.1 (0.0–0.2)   | 0.4 (-0.1–0.9) | 0.5 (-0.4–1.4) |
| Parkinsons disease          | 0.5 (0.3–0.6) | 1.5 (1.2–1.8) | 1.1 (0.7–1.4) | 1.4 (0.5–2.2)   | 1.0 (0.1–2.0)  | 0.5 (0.4–0.6)   | 0.3 (0.2–0.4)  | 0.7 (0.0–1.5)  |
| Aortic aneurysm             | 0.3 (0.2–0.5) | 2.4 (2.0–2.8) | 1.6 (1.1–2.0) | 4.3 (2.8–5.7)   | 0.4 (0.3–0.9)  | 0.8 (0.7–1.0)   | 0.4 (0.3–0.6)  | 1.9 (1.0–2.8)  |
| Autism                      | 0.1 (0.0–0.1) | 0.0 (0.0–0.1) | 0.1 (0.0–0.2) | 0.0 (0.0–0.0)   | 0.1 (0.0–0.1)  | 0.0 (0.0–0.0)   | 0.4 (-0.1–0.9) | 0.0 (0.0–0.0)  |
| Cystic fibrosis             | 0.0 (0.0–0.0) | 0.0 (0.0–0.0) | 0.0 (0.0–0.0) | 0.0 (0.0–0.0)   | 0.0 (0.0–0.0)  | 0.0 (0.0–0.0)   | 0.0 (0.0–0.0)  | 0.0 (0.0–0.0)  |
| HIV                         | 0.0 (0.0–0.0) | 0.1 (0.0–0.1) | 0.0 (0.0–0.0) | 0.0 (0.0–0.0)   | 0.0 (0.0–0.0)  | 0.0 (0.0–0.1)   | 0.0 (0.0–0.0)  | 0.0 (0.0–0.0)  |

COPD: chronic obstructive pulmonary disease; TIA: transient ischaemic attack; HIV: Human Immunodeficiency Virus

**Supplementary Table S3: Condition counts in people with incident breast cancer by patient demographics**

|                   |           | Condition count |             |             |             |            |            |             | P*     |
|-------------------|-----------|-----------------|-------------|-------------|-------------|------------|------------|-------------|--------|
|                   |           | 0               | 1           | 2           | 3           | 4          | 5          | 6+          |        |
| Age category      | 18-44     | 335 (44.0)      | 200 (26.3)  | 118 (15.5)  | 63 (8.3)    | 31 (4.1)   | 6 (0.8)    | 8 (1.1)     | <0.001 |
|                   | 45-59     | 1032 (32.4)     | 840 (26.4)  | 608 (19.1)  | 352 (11.1)  | 175 (5.5)  | 100 (3.1)  | 76 (2.4)    |        |
|                   | 60-74     | 454 (13.7)      | 709 (21.4)  | 629 (18.9)  | 520 (15.7)  | 386 (11.6) | 238 (7.2)  | 384 (11.6)  |        |
|                   | 75+       | 61 (2.8)        | 165 (7.5)   | 260 (11.9)  | 338 (15.4)  | 308 (14.1) | 296 (13.5) | 760 (34.7)  |        |
| Sex               | Female    | 1877 (20.0)     | 1899 (20.3) | 1602 (17.1) | 1264 (13.5) | 888 (9.5)  | 633 (6.8)  | 1203 (12.8) | <0.001 |
|                   | Male      | 5 (5.8)         | 15 (17.4)   | 13 (15.1)   | 9 (10.5)    | 12 (14.0)  | 7 (8.1)    | 25 (29.1)   |        |
| Ethnicity         | White     | 1601 (18.9)     | 1710 (20.2) | 1445 (17.0) | 1174 (13.8) | 820 (9.7)  | 586 (6.9)  | 1142 (13.5) | <0.001 |
|                   | Asian     | 111 (27.8)      | 77 (19.3)   | 61 (15.3)   | 42 (10.5)   | 38 (9.5)   | 26 (6.5)   | 44 (11.0)   |        |
|                   | Black     | 59 (24.0)       | 50 (20.3)   | 47 (19.1)   | 27 (11.0)   | 25 (10.2)  | 15 (6.1)   | 23 (9.3)    |        |
|                   | Other     | 61 (28.6)       | 46 (21.6)   | 45 (21.1)   | 21 (9.9)    | 11 (5.2)   | 12 (5.6)   | 17 (8.0)    |        |
| Deprivation level | 1 (least) | 542 (23.0)      | 520 (22.0)  | 408 (17.3)  | 304 (12.9)  | 210 (8.9)  | 140 (5.9)  | 235 (10.0)  | <0.001 |
|                   | 2         | 448 (20.5)      | 476 (21.8)  | 389 (17.8)  | 299 (13.7)  | 192 (8.8)  | 133 (6.1)  | 249 (11.4)  |        |
|                   | 3         | 369 (19.9)      | 374 (20.2)  | 324 (17.5)  | 253 (13.7)  | 192 (10.4) | 121 (6.5)  | 219 (11.8)  |        |
|                   | 4         | 296 (18.1)      | 308 (18.9)  | 263 (16.1)  | 230 (14.1)  | 155 (9.5)  | 132 (8.1)  | 249 (15.2)  |        |
|                   | 5 (most)  | 225 (16.0)      | 233 (16.5)  | 230 (16.3)  | 186 (13.2)  | 151 (10.7) | 111 (7.9)  | 274 (19.4)  |        |

\*p values derived from Chi-squared test

**Supplementary Table S4: Condition counts in men with incident prostate cancer by patient demographics**

|                   |           | Condition count |             |             |             |             |            |             | P*     |
|-------------------|-----------|-----------------|-------------|-------------|-------------|-------------|------------|-------------|--------|
|                   |           | 0               | 1           | 2           | 3           | 4           | 5          | 6+          |        |
| Age category      | 18-44     | 10 (41.7)       | 8 (33.3)    | -           | -           | -           | 0 (0)      | 0 (0)       | <0.001 |
|                   | 45-59     | 341 (27.9)      | 348 (28.5)  | -           | -           | -           | 34 (2.8)   | 43 (3.5)    |        |
|                   | 60-74     | 690 (13.3)      | 1055 (20.3) | 1127 (21.7) | 870 (16.7)  | 578 (11.1)  | 343 (6.6)  | 532 (10.2)  |        |
|                   | 75+       | 139 (3.7)       | 379 (10.0)  | 539 (14.2)  | 589 (15.5)  | 573 (15.1)  | 464 (12.2) | 1107 (29.2) |        |
| Ethnicity         | White     | 1042 (11.2)     | 1592 (17.1) | 1745 (18.7) | 1463 (15.7) | 1139 (12.2) | 759 (8.2)  | 1570 (16.9) | <0.001 |
|                   | Asian     | 16 (7.0)        | 32 (14.1)   | 36 (15.9)   | 28 (12.3)   | 27 (11.9)   | 33 (14.5)  | 55 (24.2)   |        |
|                   | Black     | 59 (14.3)       | 89 (21.6)   | 78 (18.9)   | 79 (19.2)   | 38 (9.2)    | 32 (7.8)   | 37 (9.0)    |        |
|                   | Other     | 31 (21.2)       | 33 (22.6)   | 18 (12.3)   | 22 (15.1)   | 14 (9.6)    | 10 (6.8)   | 18 (12.3)   |        |
| Deprivation level | 1 (least) | 377 (13.6)      | 527 (19.0)  | 546 (19.6)  | 421 (15.1)  | 332 (11.9)  | 183 (6.6)  | 393 (14.1)  | <0.001 |
|                   | 2         | 295 (12.1)      | 434 (17.8)  | 482 (19.8)  | 371 (15.3)  | 284 (11.7)  | 190 (7.8)  | 376 (15.5)  |        |
|                   | 3         | 214 (10.9)      | 344 (17.5)  | 384 (19.5)  | 300 (15.3)  | 229 (11.6)  | 166 (8.4)  | 329 (16.7)  |        |
|                   | 4         | 198 (11.4)      | 293 (16.9)  | 308 (17.7)  | 281 (16.2)  | 219 (12.6)  | 162 (9.3)  | 276 (15.9)  |        |
|                   | 5 (most)  | 95 (7.3)        | 189 (14.5)  | 187 (14.3)  | 229 (17.5)  | 161 (12.3)  | 138 (10.6) | 307 (23.5)  |        |

\*p values derived from Chi-squared test, - primary suppression of cells for any cell with <5 people and corresponding secondary suppression

**Supplementary Table S5: Condition counts in people with incident colorectal cancer by patient demographics**

|                   |           | Condition count |            |             |            |            |            |             | P*     |
|-------------------|-----------|-----------------|------------|-------------|------------|------------|------------|-------------|--------|
|                   |           | 0               | 1          | 2           | 3          | 4          | 5          | 6+          |        |
| Age category      | 18-44     | 89 (35.3)       | 83 (32.9)  | 35 (13.9)   | 23 (9.1)   | 12 (4.8)   | 5 (2.0)    | 5 (2.0)     | <0.001 |
|                   | 45-59     | 303 (27.9)      | 255 (23.5) | 221 (20.3)  | 141 (13.0) | 65 (6.0)   | 41 (3.8)   | 61 (5.6)    |        |
|                   | 60-74     | 332 (12.5)      | 485 (18.2) | 517 (19.4)  | 389 (14.6) | 311 (11.7) | 245 (9.2)  | 385 (14.5)  |        |
|                   | 75+       | 101 (3.1)       | 234 (7.3)  | 378 (11.8)  | 494 (15.4) | 454 (14.1) | 391 (12.2) | 1161 (36.1) |        |
| Sex               | Female    | 357 (11.0)      | 464 (14.2) | 509 (15.6)  | 481 (14.8) | 376 (11.5) | 319 (9.8)  | 754 (23.1)  | 0.540  |
|                   | Male      | 468 (11.8)      | 593 (15.0) | 642 (16.2)  | 566 (14.3) | 466 (11.8) | 363 (9.2)  | 858 (21.7)  |        |
| Ethnicity         | White     | 734 (10.9)      | 953 (14.2) | 1074 (16.0) | 976 (14.5) | 792 (11.8) | 643 (9.6)  | 1536 (22.9) | <0.001 |
|                   | Asian     | 24 (15.0)       | 21 (13.1)  | 22 (13.8)   | 30 (18.8)  | 18 (11.2)  | 10 (6.2)   | 35 (21.9)   |        |
|                   | Black     | 22 (14.6)       | 37 (24.5)  | 24 (15.9)   | 20 (13.2)  | 17 (11.3)  | 14 (9.3)   | 17 (11.3)   |        |
|                   | Other     | 22 (19.8)       | 22 (19.8)  | 19 (17.1)   | 9 (8.1)    | 7 (6.3)    | 12 (10.8)  | 20 (18.0)   |        |
| Deprivation level | 1 (least) | 235 (13.6)      | 285 (16.4) | 292 (16.8)  | 231 (13.3) | 207 (11.9) | 156 (9.0)  | 327 (18.9)  | <0.001 |
|                   | 2         | 172 (10.8)      | 251 (15.7) | 268 (16.8)  | 225 (14.1) | 176 (11.0) | 184 (11.5) | 319 (20.0)  |        |
|                   | 3         | 150 (10.8)      | 204 (14.7) | 220 (15.8)  | 205 (14.7) | 171 (12.3) | 119 (8.6)  | 322 (23.1)  |        |
|                   | 4         | 162 (12.3)      | 178 (13.5) | 206 (15.6)  | 207 (15.7) | 151 (11.4) | 107 (8.1)  | 311 (23.5)  |        |
|                   | 5 (most)  | 106 (9.1)       | 136 (11.6) | 164 (14.0)  | 179 (15.3) | 137 (11.7) | 115 (9.8)  | 333 (28.5)  |        |

\*p values derived from Chi-squared test

**Supplementary Table S6: Condition counts in people with incident lung cancer by patient demographics**

|                   |           | Condition count |            |            |            |            |            |             | P*     |
|-------------------|-----------|-----------------|------------|------------|------------|------------|------------|-------------|--------|
|                   |           | 0               | 1          | 2          | 3          | 4          | 5          | 6+          |        |
| Age category      | 18-44     | 26 (37.1)       | 20 (28.6)  | 10 (14.3)  | 8 (11.4)   | -          | 0 (0)      | -           | <0.001 |
|                   | 45-59     | 101 (15.3)      | 121 (18.3) | 128 (19.3) | 80 (12.1)  | -          | 64 (9.7)   | -           |        |
|                   | 60-74     | 168 (6.3)       | 297 (11.2) | 404 (15.2) | 416 (15.6) | 360 (13.5) | 300 (11.3) | 714 (26.9)  |        |
|                   | 75+       | 43 (1.4)        | 123 (4.1)  | 246 (8.3)  | 367 (12.4) | 393 (13.2) | 369 (12.4) | 1428 (48.1) |        |
| Sex               | Female    | 141 (4.6)       | 247 (8.1)  | 386 (12.7) | 412 (13.5) | 390 (12.8) | 357 (11.7) | 1116 (36.6) | 0.036  |
|                   | Male      | 197 (5.9)       | 314 (9.5)  | 402 (12.1) | 459 (13.9) | 445 (13.4) | 376 (11.4) | 1118 (33.8) |        |
| Ethnicity         | White     | 298 (5.0)       | 500 (8.4)  | 720 (12.1) | 819 (13.7) | 790 (13.2) | 696 (11.7) | 2150 (36.0) | <0.001 |
|                   | Asian     | 10 (7.1)        | 11 (7.9)   | 17 (12.1)  | 21 (15.0)  | 19 (13.6)  | 16 (11.4)  | 46 (32.9)   |        |
|                   | Black     | 13 (12.4)       | 19 (18.1)  | 20 (19.0)  | -          | 7 (6.7)    | -          | 18 (17.1)   |        |
|                   | Other     | 8 (10.4)        | 16 (20.8)  | 15 (19.5)  | -          | 11 (14.3)  | -          | 17 (22.1)   |        |
| Deprivation level | 1 (least) | 68 (6.5)        | 87 (8.3)   | 157 (14.9) | 157 (14.9) | 140 (13.3) | 124 (11.8) | 321 (30.5)  | <0.001 |
|                   | 2         | 77 (6.5)        | 123 (10.4) | 143 (12.1) | 155 (13.2) | 165 (14.0) | 136 (11.5) | 379 (32.2)  |        |
|                   | 3         | 73 (6.3)        | 109 (9.5)  | 133 (11.6) | 168 (14.6) | 145 (12.6) | 144 (12.5) | 379 (32.9)  |        |
|                   | 4         | 58 (4.2)        | 121 (8.9)  | 168 (12.3) | 187 (13.7) | 178 (13.0) | 146 (10.7) | 508 (37.2)  |        |
|                   | 5 (most)  | 62 (3.9)        | 121 (7.5)  | 187 (11.6) | 203 (12.6) | 206 (12.8) | 183 (11.4) | 645 (40.1)  |        |

\*p values derived from Chi-squared test, - primary suppression of cells for any cell with <5 people and corresponding secondary suppression

**Supplementary Table S7: Condition counts in people living with and beyond breast cancer by patient demographics**

|                   |           | Condition count |             |             |            |            |            |             |        |
|-------------------|-----------|-----------------|-------------|-------------|------------|------------|------------|-------------|--------|
|                   |           | 0               | 1           | 2           | 3          | 4          | 5          | 6+          | P*     |
| Age category      | 18-44     | 116 (35.2)      | 86 (26.1)   | 75 (22.7)   | 28 (8.5)   | 11 (3.3)   | -          | -           | <0.001 |
|                   | 45-59     | 602 (25.2)      | 642 (26.9)  | 452 (18.9)  | 304 (12.7) | 191 (8.0)  | -          | -           |        |
|                   | 60-74     | 282 (9.8)       | 533 (18.4)  | 599 (20.7)  | 472 (16.3) | 363 (12.6) | 233 (8.1)  | 407 (14.1)  |        |
|                   | 75+       | 31 (1.9)        | 94 (5.9)    | 166 (10.4)  | 242 (15.2) | 235 (14.7) | 213 (13.4) | 613 (38.5)  |        |
| Sex               | Female    | -               | 1348 (18.8) | 1285 (17.9) | -          | 793 (11.1) | -          | 1113 (15.5) | 0.590  |
|                   | Male      | -               | 7 (17.5)    | 7 (17.5)    | -          | 7 (17.5)   | -          | 9 (22.5)    |        |
| Ethnicity         | White     | 898 (13.8)      | 1231 (18.9) | 1174 (18.0) | 944 (14.5) | 711 (10.9) | 508 (7.8)  | 1056 (16.2) | 0.002  |
|                   | Asian     | 61 (18.0)       | 53 (15.7)   | 62 (18.3)   | 53 (15.7)  | 55 (16.3)  | 20 (5.9)   | 34 (10.1)   |        |
|                   | Black     | 24 (14.3)       | 29 (17.3)   | 29 (17.3)   | 31 (18.5)  | 21 (12.5)  | 16 (9.5)   | 18 (10.7)   |        |
|                   | Other     | 27 (23.3)       | 24 (20.7)   | 21 (18.1)   | 13 (11.2)  | 11 (9.5)   | 8 (6.9)    | 12 (10.3)   |        |
| Deprivation level | 1 (least) | 324 (17.2)      | 409 (21.8)  | 339 (18.0)  | 252 (13.4) | 189 (10.1) | 119 (6.3)  | 247 (13.1)  | <0.001 |
|                   | 2         | 237 (13.9)      | 351 (20.6)  | 300 (17.6)  | 242 (14.2) | 186 (10.9) | 141 (8.3)  | 246 (14.4)  |        |
|                   | 3         | 224 (15.9)      | 259 (18.4)  | 278 (19.8)  | 201 (14.3) | 154 (11.0) | 95 (6.8)   | 195 (13.9)  |        |
|                   | 4         | 154 (12.7)      | 198 (16.3)  | 209 (17.2)  | 205 (16.9) | 142 (11.7) | 98 (8.1)   | 210 (17.3)  |        |
|                   | 5 (most)  | 91 (9.2)        | 137 (13.8)  | 166 (16.8)  | 145 (14.6) | 129 (13.0) | 100 (10.1) | 222 (22.4)  |        |

\*p values derived from Chi-squared test, - primary suppression of cells for any cell with <5 people and corresponding secondary suppression

**Supplementary Table S8: Condition counts in people living with and beyond prostate cancer by patient demographics**

|                   |           | Condition count |            |            |            |            |            |             |        |
|-------------------|-----------|-----------------|------------|------------|------------|------------|------------|-------------|--------|
|                   |           | 0               | 1          | 2          | 3          | 4          | 5          | 6+          | P*     |
| Age category      | 18-44     | -               | -          | -          | 0 (0.0)    | -          | 0 (0.0)    | 0 (0.0)     | <0.001 |
|                   | 45-59     | -               | -          | -          | 27 (10.9)  | -          | 5 (2.0)    | 12 (4.9)    |        |
|                   | 60-74     | 251 (9.5)       | 517 (19.5) | 541 (20.4) | 454 (17.1) | 304 (11.5) | 220 (8.3)  | 364 (13.7)  |        |
|                   | 75+       | 100 (3.6)       | 260 (9.3)  | 349 (12.5) | 447 (16.1) | 412 (14.8) | 346 (12.4) | 867 (31.2)  |        |
| Ethnicity         | White     | 368 (7.1)       | 762 (14.6) | 857 (16.5) | 842 (16.2) | 680 (13.1) | 531 (10.2) | 1167 (22.4) | 0.552  |
|                   | Asian     | 7 (6.1)         | 14 (12.2)  | 22 (19.1)  | 24 (20.9)  | 15 (13.0)  | 13 (11.3)  | 20 (17.4)   |        |
|                   | Black     | 16 (6.9)        | 40 (17.3)  | 48 (20.8)  | 43 (18.6)  | 25 (10.8)  | 18 (7.8)   | 41 (17.7)   |        |
|                   | Other     | 8 (10.7)        | 11 (14.7)  | 15 (20.0)  | 12 (16.0)  | 9 (12.0)   | 9 (12.0)   | 11 (14.7)   |        |
| Deprivation level | 1 (least) | 134 (8.6)       | 264 (17.0) | 289 (18.6) | 260 (16.7) | 188 (12.1) | 141 (9.1)  | 281 (18.0)  | <0.001 |
|                   | 2         | 106 (7.5)       | 225 (16.0) | 229 (16.3) | 233 (16.5) | 184 (13.1) | 146 (10.4) | 286 (20.3)  |        |
|                   | 3         | 88 (8.0)        | 157 (14.2) | 192 (17.4) | 172 (15.6) | 150 (13.6) | 111 (10.1) | 234 (21.2)  |        |
|                   | 4         | 52 (6.0)        | 119 (13.7) | 129 (14.9) | 135 (15.6) | 112 (12.9) | 98 (11.3)  | 223 (25.7)  |        |
|                   | 5 (most)  | 30 (4.1)        | 82 (11.1)  | 113 (15.3) | 126 (17.0) | 96 (13.0)  | 74 (10.0)  | 219 (29.6)  |        |

\*p values derived from Chi-squared test, - primary suppression of cells for any cell with <5 people and corresponding secondary suppression

**Supplementary Table S9: Condition counts in people living with and beyond colorectal cancer by patient demographics**

|                   |           | Condition count |            |            |            |            |            |            | P*     |
|-------------------|-----------|-----------------|------------|------------|------------|------------|------------|------------|--------|
|                   |           | 0               | 1          | 2          | 3          | 4          | 5          | 6+         |        |
| Age category      | 18-44     | 29 (29.6)       | 29 (29.6)  | 19 (19.4)  | 9 (9.2)    | 7 (7.1)    | -          | -          | <0.001 |
|                   | 45-59     | 74 (19.2)       | 94 (24.4)  | 77 (19.9)  | 63 (16.3)  | 29 (7.5)   | -          | -          |        |
|                   | 60-74     | 94 (7.6)        | 206 (16.7) | 243 (19.7) | 213 (17.3) | 151 (12.3) | 127 (10.3) | 197 (16.0) |        |
|                   | 75+       | 33 (2.2)        | 85 (5.7)   | 146 (9.9)  | 223 (15.1) | 209 (14.1) | 180 (12.2) | 605 (40.9) |        |
| Sex               | Female    | 137 (7.7)       | 246 (13.9) | 248 (14.0) | 290 (16.4) | 214 (12.1) | 168 (9.5)  | 465 (26.3) | 0.102  |
|                   | Male      | 93 (6.5)        | 168 (11.8) | 237 (16.6) | 218 (15.3) | 182 (12.7) | 157 (11.0) | 373 (26.1) |        |
| Ethnicity         | White     | 206 (6.9)       | 383 (12.8) | 447 (14.9) | 479 (16.0) | 372 (12.4) | 310 (10.3) | 801 (26.7) | 0.049  |
|                   | Asian     | 11 (13.3)       | 11 (13.3)  | 15 (18.1)  | 12 (14.5)  | 10 (12.0)  | 6 (7.2)    | 18 (21.7)  |        |
|                   | Black     | -               | -          | 12 (23.5)  | 5 (9.8)    | 8 (15.7)   | -          | 13 (25.5)  |        |
|                   | Other     | -               | -          | 7 (14.9)   | 12 (25.5)  | 6 (12.8)   | -          | 5 (10.6)   |        |
| Deprivation level | 1 (least) | 61 (7.4)        | 130 (15.8) | 141 (17.2) | 124 (15.1) | 101 (12.3) | 70 (8.5)   | 195 (23.7) | 0.005  |
|                   | 2         | 61 (8.3)        | 94 (12.7)  | 116 (15.7) | 118 (16.0) | 87 (11.8)  | 75 (10.1)  | 188 (25.4) |        |
|                   | 3         | 50 (7.9)        | 89 (14.0)  | 98 (15.4)  | 103 (16.2) | 74 (11.7)  | 62 (9.8)   | 159 (25.0) |        |
|                   | 4         | 38 (6.7)        | 57 (10.1)  | 77 (13.6)  | 90 (15.9)  | 84 (14.9)  | 69 (12.2)  | 150 (26.5) |        |
|                   | 5 (most)  | 19 (4.4)        | 44 (10.2)  | 52 (12.0)  | 73 (16.9)  | 50 (11.5)  | 49 (11.3)  | 146 (33.7) |        |

\*p values derived from Chi-squared test, - primary suppression of cells for any cell with <5 people and corresponding secondary suppression

**Supplementary Table S10: Condition counts in people living with and beyond lung cancer by patient demographics**

|                   |           | Condition count |           |           |           |           |           |            | P*     |
|-------------------|-----------|-----------------|-----------|-----------|-----------|-----------|-----------|------------|--------|
|                   |           | 0               | 1         | 2         | 3         | 4         | 5         | 6+         |        |
| Age category      | 18-44     | -               | -         | -         | 0 (0.0)   | 0 (0.0)   | 0 (0.0)   | 0 (0.0)    | <0.001 |
|                   | 45-59     | 6 (8.7)         | 11 (15.9) | 16 (23.2) | 11 (15.9) | 8 (11.6)  | 5 (7.2)   | 12 (17.4)  |        |
|                   | 60-74     | 7 (2.0)         | 29 (8.5)  | 43 (12.6) | 43 (12.6) | 53 (15.5) | 46 (13.5) | 121 (35.4) |        |
|                   | 75+       | -               | -         | -         | 22 (7.1)  | 45 (14.6) | 38 (12.3) | 182 (59.1) |        |
| Sex               | Female    | 10 (2.9)        | 24 (7.0)  | 25 (7.3)  | 31 (9.1)  | 50 (14.7) | 45 (13.2) | 156 (45.7) | 0.311  |
|                   | Male      | 7 (1.8)         | 30 (7.8)  | 45 (11.7) | 45 (11.7) | 56 (14.5) | 44 (11.4) | 159 (41.2) |        |
| Ethnicity         | White     | 15 (2.2)        | 53 (7.7)  | 65 (9.5)  | 68 (9.9)  | 99 (14.4) | 88 (12.8) | 298 (43.4) | 0.116  |
|                   | Asian     | -               | -         | -         | -         | -         | -         | -          |        |
|                   | Black     | -               | -         | -         | -         | -         | -         | -          |        |
|                   | Other     | -               | -         | -         | -         | -         | -         | -          |        |
| Deprivation level | 1 (least) | -               | -         | 17 (15.2) | 8 (7.1)   | 25 (22.3) | 8 (7.1)   | 44 (39.3)  | 0.017  |
|                   | 2         | -               | -         | 13 (8.9)  | 23 (15.8) | 25 (17.1) | 13 (8.9)  | 58 (39.7)  |        |
|                   | 3         | -               | 17 (11.7) | -         | 15 (10.3) | 14 (9.7)  | 15 (10.3) | 69 (47.6)  |        |
|                   | 4         | -               | -         | 18 (11.7) | 12 (7.8)  | 17 (11.0) | 25 (16.2) | 69 (44.8)  |        |
|                   | 5 (most)  | -               | 11 (6.5)  | -         | 18 (10.7) | 25 (14.8) | 28 (16.6) | 75 (44.4)  |        |

\*p values derived from Chi-squared test, - primary suppression of cells for any cell with <5 people and corresponding secondary suppression

**Supplementary Table S11: Multimorbidity and Mental-physical Multimorbidity in Incident and PLWBC stratified by sociodemographic groups**

|                                             |           | Breast cancer |        |          |            |          | Prostate cancer |        |         |           |         | Colorectal cancer |        |          |           |         | Lung cancer |        |         |           |         |
|---------------------------------------------|-----------|---------------|--------|----------|------------|----------|-----------------|--------|---------|-----------|---------|-------------------|--------|----------|-----------|---------|-------------|--------|---------|-----------|---------|
|                                             |           | Total (N)     | MM (%) | p- value | MP -MM (%) | p- value | Total (N)       | MM (%) | p value | MP-MM (%) | p value | Total (N)         | MM (%) | p- value | MP-MM (%) | p value | Total (N)   | MM (%) | p value | MP-MM (%) | p-value |
| <b>Incident Cancer Patients</b>             |           |               |        |          |            |          |                 |        |         |           |         |                   |        |          |           |         |             |        |         |           |         |
| Sex                                         | Male      | 86            | 76.7   | 0.002    | 39.5       | 0.039    | 10230           | 71     | NA      | 23.5      | NA      | 3956              | 73.2   | 0.122    | 26.3      | <0.001  | 3311        | 84.6   | <0.001  | 34.6      | <0.001  |
|                                             | Female    | 9366          | 59.7   |          | 28.8       |          | NA              | NA     |         | NA        |         | 3260              | 74.8   |          | 33.7      |         | 3049        | 87.3   |         | 44.3      |         |
| Age Category                                | 18-44     | 761           | 29.7   | <0.001   | 17.7       | <0.001   | 24              | 25.0   | <0.001  | 16.7      | 0.015   | 252               | 31.7   | <0.001   | 19.4      | <0.001  | 70          | 34.3   | <0.001  | 18.6      | <0.001  |
|                                             | 45-59     | 3183          | 41.2   |          | 22.9       |          | 1221            | 43.6   |         | 20        |         | 1087              | 48.7   |          | 26.1      |         | 662         | 66.5   |         | 41.8      |         |
|                                             | 60-74     | 3320          | 65     |          | 31.9       |          | 5195            | 66.4   |         | 24        |         | 2664              | 69.3   |          | 30.2      |         | 2659        | 82.5   |         | 40.8      |         |
|                                             | ≥75       | 2188          | 89.7   |          | 36.8       |          | 3790            | 86.3   |         | 24.1      |         | 3213              | 89.6   |          | 31.1      |         | 2969        | 94.4   |         | 37.8      |         |
| Deprivation                                 | 1 (least) | 2359          | 55     | <0.001   | 25.4       | <0.001   | 2779            | 67.5   | <0.001  | 19.1      | <0.001  | 1733              | 70     | <0.001   | 23.7      | <0.001  | 1054        | 85.3   | <0.001  | 34.1      | <0.001  |
|                                             | 2         | 2186          | 57.7   |          | 26.3       |          | 2432            | 70.0   |         | 20.4      |         | 1595              | 73.5   |          | 29.3      |         | 1178        | 83     |         | 34.6      |         |
|                                             | 3         | 1852          | 59.9   |          | 27.9       |          | 1966            | 71.6   |         | 24.3      |         | 1391              | 74.6   |          | 29.5      |         | 1151        | 84.2   |         | 36.5      |         |
|                                             | 4         | 1633          | 63     |          | 30.9       |          | 1737            | 71.7   |         | 26.1      |         | 1322              | 74.3   |          | 32        |         | 1366        | 86.9   |         | 41.9      |         |
|                                             | 5 (most)  | 1410          | 67.5   |          | 37.8       |          | 1306            | 78.3   |         | 34        |         | 1170              | 79.3   |          | 36.2      |         | 1607        | 88.6   |         | 46        |         |
| Ethnicity                                   | White     | 8478          | 60.9   | <0.001   | 29.8       | <0.001   | 9310            | 71.7   | <0.001  | 23.9      | 0.332   | 6708              | 74.9   | <0.001   | 29.9      | 0.133   | 5973        | 86.6   | <0.001  | 40        | 0.001   |
|                                             | Asian     | 399           | 52.9   |          | 19.5       |          | 227             | 78.9   |         | 22.9      |         | 160               | 71.9   |          | 30.6      |         | 140         | 85     |         | 25        |         |
|                                             | Black     | 246           | 55.7   |          | 25.6       |          | 412             | 64.9   |         | 21.6      |         | 151               | 60.9   |          | 21.2      |         | 105         | 69.5   |         | 31.4      |         |
|                                             | Other     | 213           | 49.8   |          | 23         |          | 146             | 56.2   |         | 18.5      |         | 111               | 60.4   |          | 31.5      |         | 77          | 68.8   |         | 32.5      |         |
| <b>People living with and beyond cancer</b> |           |               |        |          |            |          |                 |        |         |           |         |                   |        |          |           |         |             |        |         |           |         |
| Sex                                         | Male      | 40            | 72.5   | 0.554    | 30         | 0.859    | 5685            | 77.9   | NA      | 27.0      | NA      | 1768              | 78.3   | 0.02     | 29.3      | <0.001  | 341         | 90     | 0.923   | 38.1      | <0.001  |
|                                             | Female    | 7159          | 66.8   |          | 32.8       |          | NA              | NA     |         | NA        |         | 1428              | 81.7   |          | 38.1      |         | 386         | 90.4   |         | 48.2      |         |
| Age Category                                | 18-44     | 330           | 38.8   | <0.001   | 20.9       | <0.001   | 6               | 50     | <0.001  | 16.7      | 0.064   | 98                | 40.8   | <0.001   | 22.4      | 0.089   | 8           | 25     | <0.001  | 12.5      | 0.194   |
|                                             | 45-59     | 2386          | 47.9   |          | 27.9       |          | 247             | 48.2   |         | 20.2      |         | 386               | 56.5   |          | 31.3      |         | 69          | 75.4   |         | 40.6      |         |
|                                             | 60-74     | 2889          | 71.8   |          | 35.4       |          | 2651            | 71     |         | 26.7      |         | 1231              | 75.6   |          | 34        |         | 342         | 89.5   |         | 46.2      |         |
|                                             | ≥75       | 1594          | 92.9   |          | 37.8       |          | 2781            | 87.1   |         | 27.9      |         | 1481              | 92     |          | 33.9      |         | 308         | 96.1   |         | 41.9      |         |
| Deprivation                                 | 1 (least) | 1879          | 61     | <0.001   | 28.5       | <0.001   | 1557            | 74.4   | <0.001  | 22.7      | <0.001  | 822               | 76.8   | <0.001   | 29.8      | <0.001  | 112         | 91.1   | 0.416   | 36.6      | 0.462   |
|                                             | 2         | 1703          | 65.5   |          | 31.3       |          | 1409            | 76.5   |         | 27.5      |         | 739               | 79     |          | 34.8      |         | 146         | 90.4   |         | 44.5      |         |
|                                             | 3         | 1406          | 65.6   |          | 31         |          | 1104            | 77.8   |         | 25.1      |         | 635               | 78.1   |          | 27.1      |         | 145         | 86.2   |         | 42.8      |         |
|                                             | 4         | 1216          | 71.1   |          | 35.7       |          | 868             | 80.3   |         | 28.9      |         | 565               | 83.2   |          | 37        |         | 154         | 91.6   |         | 43.5      |         |
|                                             | 5 (most)  | 990           | 77     |          | 42.8       |          | 740             | 84.9   |         | 35.7      |         | 433               | 85.5   |          | 41.3      |         | 169         | 92.3   |         | 47.9      |         |
| Ethnicity                                   | White     | 6522          | 67.4   | 0.076    | 33.5       | 0.006    | 5207            | 78.3   | 0.526   | 27.4      | 0.119   | 2998              | 80.4   | 0.027    | 34.20     | <0.001  | 686         | 90.1   | 0.7     | 43.9      | 0.017   |
|                                             | Asian     | 338           | 66.3   |          | 26.9       |          | 115             | 81.7   |         | 18.3      |         | 83                | 73.5   |          | 12.0      |         | 19          | 94.7   |         | 15.8      |         |
|                                             | Black     | 168           | 68.5   |          | 27.4       |          | 231             | 75.8   |         | 24.7      |         | 51                | 88.2   |          | 37.3      |         | 14          | 85.7   |         | 35.7      |         |
|                                             | Other     | 116           | 56     |          | 25         |          | 75              | 74.7   |         | 24.0      |         | 47                | 66     |          | 14.9      |         | 6           | 100    |         | 83.3      |         |

Footnote: MM= Multimorbidity, MP-MM= Mental-physical multimorbidity. \*p values derived from Chi-squared test

**Supplementary Table S12: Logistic regression model of unadjusted and adjusted odds of multimorbidity prevalence in women newly diagnosed with one of three cancers**

| Incident Female cancer patients |            |             |             |                              |                              |
|---------------------------------|------------|-------------|-------------|------------------------------|------------------------------|
| Multimorbidity                  |            | No          | Yes         | OR (univariable)             | OR (multivariable)           |
| Cancer type                     | Colorectal | 795 (24.9)  | 2404 (75.1) | -                            | -                            |
|                                 | Breast     | 3681 (40.0) | 5530 (60.0) | 0.50 (0.45-0.54, p<0.001)    | 0.83 (0.75-0.91, p<0.001)    |
|                                 | Lung       | 377 (12.5)  | 2641 (87.5) | 2.32 (2.03-2.65, p<0.001)    | 2.15 (1.86-2.49, p<0.001)    |
| Age category                    | 18-44      | 632 (69.2)  | 281 (30.8)  | -                            | -                            |
|                                 | 45-59      | 2179 (55.4) | 1757 (44.6) | 1.81 (1.56-2.12, p<0.001)    | 1.79 (1.53-2.09, p<0.001)    |
|                                 | 60-74      | 1626 (29.4) | 3914 (70.6) | 5.41 (4.66-6.31, p<0.001)    | 4.81 (4.12-5.63, p<0.001)    |
|                                 | 75+        | 416 (8.3)   | 4623 (91.7) | 24.99 (21.06-29.75, p<0.001) | 21.68 (18.17-25.93, p<0.001) |
| Deprivation level               | 1 (least)  | 1318 (37.1) | 2233 (62.9) | -                            | -                            |
|                                 | 2          | 1164 (34.3) | 2234 (65.7) | 1.13 (1.03-1.25, p=0.013)    | 1.11 (1.00-1.25, p=0.055)    |
|                                 | 3          | 942 (32.2)  | 1984 (67.8) | 1.24 (1.12-1.38, p<0.001)    | 1.27 (1.13-1.42, p<0.001)    |
|                                 | 4          | 811 (28.6)  | 2022 (71.4) | 1.47 (1.32-1.64, p<0.001)    | 1.58 (1.40-1.78, p<0.001)    |
|                                 | 5 (most)   | 618 (22.7)  | 2102 (77.3) | 2.01 (1.79-2.25, p<0.001)    | 2.09 (1.84-2.38, p<0.001)    |
| Ethnicity                       | White      | 4359 (30.5) | 9910 (69.5) | -                            | -                            |
|                                 | Asian      | 214 (42.0)  | 296 (58.0)  | 0.61 (0.51-0.73, p<0.001)    | 1.01 (0.83-1.24, p=0.921)    |
|                                 | Black      | 145 (40.7)  | 211 (59.3)  | 0.64 (0.52-0.79, p<0.001)    | 0.86 (0.68-1.10, p=0.223)    |
|                                 | Other      | 135 (46.1)  | 158 (53.9)  | 0.51 (0.41-0.65, p<0.001)    | 0.81 (0.63-1.05, p=0.112)    |

**Supplementary Table S13: Logistic regression model of unadjusted and fully adjusted odds of multimorbidity in women living with one of three cancers**

| Female survivors |            |             |             |                           |                           |
|------------------|------------|-------------|-------------|---------------------------|---------------------------|
| Multimorbidity   |            | No          | Yes         | OR (univariable)          | OR (multivariable)        |
| Cancer Type      | Colorectal | 255 (18.1)  | 1151 (81.9) | -                         | -                         |
|                  | Breast     | 2332 (32.9) | 4751 (67.1) | 0.45 (0.39-0.52, p<0.001) | 0.74 (0.63-0.87, p<0.001) |
|                  | Lung       | 37 (9.6)    | 348 (90.4)  | 2.08 (1.46-3.04, p<0.001) | 2.11 (1.45-3.12, p<0.001) |
| Age category     | 18-44      | 223 (59.2)  | 154 (40.8)  | -                         | -                         |

|                   |       |             |             |                              |                              |
|-------------------|-------|-------------|-------------|------------------------------|------------------------------|
|                   | 45-59 | 1302 (50.5) | 1278 (49.5) | 1.42 (1.14-1.77, p=0.002)    | 1.49 (1.19-1.86, p=0.001)    |
|                   | 60-74 | 922 (26.2)  | 2596 (73.8) | 4.08 (3.28-5.08, p<0.001)    | 4.19 (3.36-5.25, p<0.001)    |
|                   | 75+   | 177 (7.4)   | 2222 (92.6) | 18.18 (14.10-23.54, p<0.001) | 18.26 (14.08-23.77, p<0.001) |
| Deprivation level | 1     | 788 (35.0)  | 1462 (65.0) | -                            | -                            |
|                   | 2     | 648 (31.1)  | 1436 (68.9) | 1.19 (1.05-1.36, p=0.006)    | 1.21 (1.05-1.38, p=0.009)    |
|                   | 3     | 542 (31.2)  | 1193 (68.8) | 1.19 (1.04-1.36, p=0.012)    | 1.24 (1.07-1.44, p=0.004)    |
|                   | 4     | 385 (25.1)  | 1150 (74.9) | 1.61 (1.39-1.86, p<0.001)    | 1.68 (1.43-1.97, p<0.001)    |
|                   | 5     | 261 (20.6)  | 1009 (79.4) | 2.08 (1.78-2.45, p<0.001)    | 2.29 (1.92-2.73, p<0.001)    |
| Ethnicity         | White | 2388 (29.3) | 5760 (70.7) | -                            | -                            |
|                   | Asian | 123 (31.9)  | 263 (68.1)  | 0.89 (0.71-1.11, p=0.282)    | 1.27 (1.00-1.61, p=0.047)    |
|                   | Black | 55 (27.1)   | 148 (72.9)  | 1.12 (0.82-1.54, p=0.494)    | 1.35 (0.96-1.90, p=0.085)    |
|                   | Other | 58 (42.3)   | 79 (57.7)   | 0.56 (0.40-0.80, p=0.001)    | 0.75 (0.52-1.09, p=0.129)    |

**Supplementary Table S14: Logistic regression model of unadjusted and fully adjusted odds of multimorbidity in men newly diagnosed with one of four cancers**

| Incident Males        |            | No          | Yes         | OR (univariable)             | OR (multivariable)           |
|-----------------------|------------|-------------|-------------|------------------------------|------------------------------|
| <b>Multimorbidity</b> |            |             |             |                              |                              |
| Cancer Type           | Colorectal | 1017 (26.5) | 2826 (73.5) | -                            | -                            |
|                       | Breast     | 20 (24.4)   | 62 (75.6)   | 1.12 (0.68-1.90, p=0.674)    | 1.33 (0.78-2.37, p=0.315)    |
|                       | Lung       | 498 (15.2)  | 2775 (84.8) | 2.01 (1.78-2.26, p<0.001)    | 1.71 (1.50-1.94, p<0.001)    |
|                       | Prostate   | 2879 (28.7) | 7149 (71.3) | 0.89 (0.82-0.97, p=0.008)    | 0.87 (0.79-0.95, p=0.002)    |
| Age category          | 18-44      | 126 (70.4)  | 53 (29.6)   | -                            | -                            |
|                       | 45-59      | 1067 (50.9) | 1030 (49.1) | 2.29 (1.66-3.22, p<0.001)    | 2.43 (1.74-3.43, p<0.001)    |
|                       | 60-74      | 2444 (30.3) | 5617 (69.7) | 5.46 (3.97-7.62, p<0.001)    | 5.95 (4.30-8.36, p<0.001)    |
|                       | 75+        | 777 (11.3)  | 6112 (88.7) | 18.70 (13.53-26.19, p<0.001) | 20.11 (14.45-28.35, p<0.001) |
| Deprivation level     | 1          | 1231 (29.2) | 2980 (70.8) | -                            | -                            |
|                       | 2          | 1046 (27.1) | 2813 (72.9) | 1.11 (1.01-1.22, p=0.034)    | 1.09 (0.98-1.21, p=0.096)    |
|                       | 3          | 844 (25.4)  | 2478 (74.6) | 1.21 (1.09-1.34, p<0.001)    | 1.22 (1.09-1.36, p<0.001)    |

|           |       |             |              |                           |                           |
|-----------|-------|-------------|--------------|---------------------------|---------------------------|
|           | 4     | 768 (24.5)  | 2370 (75.5)  | 1.27 (1.15-1.42, p<0.001) | 1.36 (1.22-1.53, p<0.001) |
|           | 5     | 525 (19.5)  | 2171 (80.5)  | 1.71 (1.52-1.92, p<0.001) | 1.92 (1.69-2.18, p<0.001) |
| Ethnicity | White | 4026 (25.1) | 11992 (74.9) | -                         | -                         |
|           | Asian | 86 (21.0)   | 324 (79.0)   | 1.26 (1.00-1.62, p=0.055) | 1.29 (1.00-1.67, p=0.051) |
|           | Black | 200 (36.4)  | 350 (63.6)   | 0.59 (0.49-0.70, p<0.001) | 0.68 (0.56-0.83, p<0.001) |
|           | Other | 102 (41.1)  | 146 (58.9)   | 0.48 (0.37-0.62, p<0.001) | 0.61 (0.46-0.80, p<0.001) |

**Supplementary Table S15: Logistic regression model of unadjusted and fully adjusted odds of multimorbidity in men living with one of four cancers**

| <b>Male survivors</b> |            |             |             |                             |                              |
|-----------------------|------------|-------------|-------------|-----------------------------|------------------------------|
| <b>Multimorbidity</b> |            | <b>No</b>   | <b>Yes</b>  | <b>OR (univariable)</b>     | <b>OR (multivariable)</b>    |
| Cancer Type           | Colorectal | 373 (21.5)  | 1362 (78.5) | -                           | -                            |
|                       | Breast     | 11 (27.5)   | 29 (72.5)   | 0.72 (0.37-1.52, p=0.364)   | 0.63 (0.31-1.41, p=0.237)    |
|                       | Lung       | 33 (9.7)    | 306 (90.3)  | 2.54 (1.77-3.76, p<0.001)   | 2.20 (1.51-3.30, p<0.001)    |
|                       | Prostate   | 1223 (21.8) | 4378 (78.2) | 0.98 (0.86-1.12, p=0.766)   | 0.78 (0.67-0.90, p=0.001)    |
| Age category          | 18-44      | 41 (68.3)   | 19 (31.7)   | -                           | -                            |
|                       | 45-59      | 226 (48.3)  | 242 (51.7)  | 2.31 (1.32-4.18, p=0.004)   | 3.01 (1.69-5.52, p<0.001)    |
|                       | 60-74      | 950 (27.2)  | 2547 (72.8) | 5.79 (3.39-10.23, p<0.001)  | 8.52 (4.88-15.41, p<0.001)   |
|                       | 75+        | 423 (11.5)  | 3267 (88.5) | 16.67 (9.72-29.60, p<0.001) | 25.14 (14.32-45.67, p<0.001) |
| Deprivation level     | 1 (least)  | 507 (24.7)  | 1544 (75.3) | -                           | -                            |
|                       | 2          | 416 (22.4)  | 1442 (77.6) | 1.14 (0.98-1.32, p=0.087)   | 1.14 (0.98-1.33, p=0.098)    |
|                       | 3          | 327 (21.5)  | 1196 (78.5) | 1.20 (1.03-1.41, p=0.023)   | 1.25 (1.06-1.48, p=0.009)    |
|                       | 4          | 240 (19.3)  | 1002 (80.7) | 1.37 (1.15-1.63, p<0.001)   | 1.43 (1.19-1.72, p<0.001)    |
|                       | 5 (most)   | 150 (14.4)  | 891 (85.6)  | 1.95 (1.60-2.39, p<0.001)   | 2.29 (1.86-2.85, p<0.001)    |
| Ethnicity             | White      | 1518 (21.1) | 5667 (78.9) | -                           | -                            |
|                       | Asian      | 33 (19.8)   | 134 (80.2)  | 1.09 (0.75-1.62, p=0.669)   | 1.39 (0.93-2.14, p=0.118)    |
|                       | Black      | 61 (23.8)   | 195 (76.2)  | 0.86 (0.64-1.16, p=0.299)   | 0.83 (0.61-1.16, p=0.266)    |
|                       | Other      | 28 (26.2)   | 79 (73.8)   | 0.76 (0.50-1.19, p=0.207)   | 0.98 (0.62-1.60, p=0.938)    |

**Supplementary Table S16: Logistic regression model of unadjusted and fully adjusted odds of mental-physical multimorbidity in women newly diagnosed with one of three cancers**

| <b>Incident Female</b>                |            |             |             |                           |                           |
|---------------------------------------|------------|-------------|-------------|---------------------------|---------------------------|
| <b>Mental-physical multimorbidity</b> |            | <b>No</b>   | <b>Yes</b>  | <b>OR (univariable)</b>   | <b>OR (multivariable)</b> |
| Cancer Type                           | Colorectal | 2118 (66.2) | 1081 (33.8) | -                         | -                         |
|                                       | Breast     | 6541 (71.0) | 2670 (29.0) | 0.80 (0.73-0.87, p<0.001) | 0.92 (0.84-1.01, p=0.073) |
|                                       | Lung       | 1678 (55.6) | 1340 (44.4) | 1.56 (1.41-1.73, p<0.001) | 1.42 (1.28-1.57, p<0.001) |
| Age category                          | 18-44      | 744 (81.5)  | 169 (18.5)  | -                         | -                         |
|                                       | 45-59      | 2937 (74.6) | 999 (25.4)  | 1.50 (1.25-1.80, p<0.001) | 1.45 (1.21-1.75, p<0.001) |
|                                       | 60-74      | 3567 (64.4) | 1973 (35.6) | 2.44 (2.05-2.91, p<0.001) | 2.16 (1.81-2.59, p<0.001) |
|                                       | 75+        | 3089 (61.3) | 1950 (38.7) | 2.78 (2.34-3.32, p<0.001) | 2.39 (2.00-2.87, p<0.001) |
| Deprivation level                     | 1          | 2557 (72.0) | 994 (28.0)  | -                         | -                         |
|                                       | 2          | 2370 (69.7) | 1028 (30.3) | 1.12 (1.01-1.24, p=0.038) | 1.10 (0.99-1.22, p=0.075) |
|                                       | 3          | 2007 (68.6) | 919 (31.4)  | 1.18 (1.06-1.31, p=0.003) | 1.17 (1.05-1.31, p=0.004) |
|                                       | 4          | 1826 (64.5) | 1007 (35.5) | 1.42 (1.28-1.58, p<0.001) | 1.42 (1.27-1.58, p<0.001) |
|                                       | 5          | 1577 (58.0) | 1143 (42.0) | 1.86 (1.68-2.07, p<0.001) | 1.80 (1.61-2.00, p<0.001) |
| Ethnicity                             | White      | 9457 (66.3) | 4812 (33.7) | -                         | -                         |
|                                       | Asian      | 398 (78.0)  | 112 (22.0)  | 0.55 (0.45-0.68, p<0.001) | 0.64 (0.52-0.80, p<0.001) |
|                                       | Black      | 266 (74.7)  | 90 (25.3)   | 0.66 (0.52-0.84, p=0.001) | 0.68 (0.53-0.86, p=0.002) |
|                                       | Other      | 216 (73.7)  | 77 (26.3)   | 0.70 (0.54-0.91, p=0.008) | 0.82 (0.62-1.07, p=0.144) |

**Supplementary Table S17: Logistic regression model of unadjusted and fully adjusted odds of mental-physical multimorbidity in women living with one of three cancers**

| <b>Female survivors</b>               |            |             |             |                           |                           |
|---------------------------------------|------------|-------------|-------------|---------------------------|---------------------------|
| <b>Mental-physical multimorbidity</b> |            | <b>No</b>   | <b>Yes</b>  | <b>OR (univariable)</b>   | <b>OR (multivariable)</b> |
| Cancer Type                           | Colorectal | 869 (61.8)  | 537 (38.2)  | -                         | -                         |
|                                       | Breast     | 4749 (67.0) | 2334 (33.0) | 0.80 (0.71-0.90, p<0.001) | 0.87 (0.77-0.98, p=0.027) |

|                   |       |             |             |                           |                           |
|-------------------|-------|-------------|-------------|---------------------------|---------------------------|
|                   | Lung  | 200 (51.9)  | 185 (48.1)  | 1.50 (1.19-1.88, p<0.001) | 1.39 (1.10-1.74, p=0.005) |
| Age category      | 18-44 | 292 (77.5)  | 85 (22.5)   | -                         | -                         |
|                   | 45-59 | 1834 (71.1) | 746 (28.9)  | 1.40 (1.09-1.81, p=0.010) | 1.38 (1.07-1.80, p=0.013) |
|                   | 60-74 | 2214 (62.9) | 1304 (37.1) | 2.02 (1.58-2.61, p<0.001) | 1.92 (1.50-2.48, p<0.001) |
|                   | 75+   | 1478 (61.6) | 921 (38.4)  | 2.14 (1.67-2.78, p<0.001) | 1.96 (1.52-2.55, p<0.001) |
| Deprivation level | 1     | 1567 (69.6) | 683 (30.4)  | -                         | -                         |
|                   | 2     | 1400 (67.2) | 684 (32.8)  | 1.12 (0.99-1.27, p=0.081) | 1.11 (0.98-1.26, p=0.111) |
|                   | 3     | 1180 (68.0) | 555 (32.0)  | 1.08 (0.94-1.24, p=0.269) | 1.10 (0.96-1.26, p=0.187) |
|                   | 4     | 958 (62.4)  | 577 (37.6)  | 1.38 (1.20-1.58, p<0.001) | 1.41 (1.23-1.62, p<0.001) |
|                   | 5     | 713 (56.1)  | 557 (43.9)  | 1.79 (1.55-2.07, p<0.001) | 1.83 (1.59-2.12, p<0.001) |
| Ethnicity         | White | 5281 (64.8) | 2867 (35.2) | -                         | -                         |
|                   | Asian | 289 (74.9)  | 97 (25.1)   | 0.62 (0.49-0.78, p<0.001) | 0.64 (0.50-0.80, p<0.001) |
|                   | Black | 145 (71.4)  | 58 (28.6)   | 0.74 (0.54-1.00, p=0.052) | 0.69 (0.50-0.94, p=0.021) |
|                   | Other | 103 (75.2)  | 34 (24.8)   | 0.61 (0.41-0.89, p=0.012) | 0.64 (0.43-0.94, p=0.028) |

**Supplementary Table S18: Logistic regression model of unadjusted and fully adjusted odds of mental-physical multimorbidity in men newly diagnosed with one of four cancers**

| Incident Males                 |            |             |             |                           |                           |
|--------------------------------|------------|-------------|-------------|---------------------------|---------------------------|
| Mental-physical multimorbidity |            | No          | Yes         | OR (univariable)          | OR (multivariable)        |
| Cancer Type                    | Colorectal | 2819 (73.4) | 1024 (26.6) | -                         | -                         |
|                                | Breast     | 51 (62.2)   | 31 (37.8)   | 1.67 (1.05-2.61, p=0.026) | 1.78 (1.12-2.79, p=0.013) |
|                                | Lung       | 2133 (65.2) | 1140 (34.8) | 1.47 (1.33-1.63, p<0.001) | 1.37 (1.23-1.51, p<0.001) |
|                                | Prostate   | 7652 (76.3) | 2376 (23.7) | 0.85 (0.79-0.93, p<0.001) | 0.87 (0.80-0.95, p=0.001) |
| Age category                   | 18-44      | 149 (83.2)  | 30 (16.8)   | -                         | -                         |
|                                | 45-59      | 1576 (75.2) | 521 (24.8)  | 1.64 (1.11-2.50, p=0.016) | 1.71 (1.15-2.61, p=0.010) |
|                                | 60-74      | 5885 (73.0) | 2176 (27.0) | 1.84 (1.26-2.78, p=0.003) | 1.95 (1.33-2.97, p=0.001) |

|                   |       |              |             |                           |                           |
|-------------------|-------|--------------|-------------|---------------------------|---------------------------|
|                   | 75+   | 5045 (73.2)  | 1844 (26.8) | 1.82 (1.24-2.75, p=0.003) | 1.89 (1.28-2.87, p=0.002) |
| Deprivation level | 1     | 3328 (79.0)  | 883 (21.0)  | -                         | -                         |
|                   | 2     | 2963 (76.8)  | 896 (23.2)  | 1.14 (1.03-1.27, p=0.015) | 1.12 (1.01-1.25, p=0.033) |
|                   | 3     | 2432 (73.2)  | 890 (26.8)  | 1.38 (1.24-1.53, p<0.001) | 1.36 (1.22-1.51, p<0.001) |
|                   | 4     | 2213 (70.5)  | 925 (29.5)  | 1.58 (1.42-1.75, p<0.001) | 1.55 (1.39-1.73, p<0.001) |
|                   | 5     | 1719 (63.8)  | 977 (36.2)  | 2.14 (1.92-2.39, p<0.001) | 2.07 (1.85-2.31, p<0.001) |
| Ethnicity         | White | 11730 (73.2) | 4288 (26.8) | -                         | -                         |
|                   | Asian | 310 (75.6)   | 100 (24.4)  | 0.88 (0.70-1.10, p=0.283) | 0.82 (0.64-1.02, p=0.083) |
|                   | Black | 424 (77.1)   | 126 (22.9)  | 0.81 (0.66-0.99, p=0.044) | 0.70 (0.57-0.86, p=0.001) |
|                   | Other | 191 (77.0)   | 57 (23.0)   | 0.82 (0.60-1.09, p=0.182) | 0.78 (0.57-1.05, p=0.104) |

**Supplementary Table S19: Logistic regression model of unadjusted and fully adjusted odds of mental-physical multimorbidity in men living with one of four cancers**

| Male survivors                        |            | No          | Yes         | OR (univariable)          | OR (multivariable)        |
|---------------------------------------|------------|-------------|-------------|---------------------------|---------------------------|
| <b>Mental-physical multimorbidity</b> |            |             |             |                           |                           |
| Cancer Type                           | Colorectal | 1224 (70.5) | 511 (29.5)  | -                         | -                         |
|                                       | Breast     | 28 (70.0)   | 12 (30.0)   | 1.03 (0.50-1.99, p=0.940) | 1.02 (0.50-2.00, p=0.945) |
|                                       | Lung       | 210 (61.9)  | 129 (38.1)  | 1.47 (1.15-1.87, p=0.002) | 1.34 (1.05-1.72, p=0.018) |
|                                       | Prostate   | 4083 (72.9) | 1518 (27.1) | 0.89 (0.79-1.00, p=0.056) | 0.86 (0.76-0.97, p=0.016) |
| Age category                          | 18-44      | 52 (86.7)   | 8 (13.3)    | -                         | -                         |
|                                       | 45-59      | 354 (75.6)  | 114 (24.4)  | 2.09 (1.02-4.88, p=0.061) | 2.26 (1.09-5.31, p=0.040) |
|                                       | 60-74      | 2516 (71.9) | 981 (28.1)  | 2.53 (1.27-5.79, p=0.015) | 2.84 (1.41-6.54, p=0.007) |
|                                       | 75+        | 2623 (71.1) | 1067 (28.9) | 2.64 (1.33-6.04, p=0.011) | 2.97 (1.47-6.84, p=0.005) |
| Deprivation level                     | 1          | 1565 (76.3) | 486 (23.7)  | -                         | -                         |
|                                       | 2          | 1316 (70.8) | 542 (29.2)  | 1.33 (1.15-1.53, p<0.001) | 1.33 (1.15-1.53, p<0.001) |
|                                       | 3          | 1133 (74.4) | 390 (25.6)  | 1.11 (0.95-1.29, p=0.189) | 1.12 (0.96-1.31, p=0.152) |
|                                       | 4          | 869 (70.0)  | 373 (30.0)  | 1.38 (1.18-1.62, p<0.001) | 1.40 (1.19-1.65, p<0.001) |
|                                       | 5          | 662 (63.6)  | 379 (36.4)  | 1.84 (1.57-2.17, p<0.001) | 1.92 (1.63-2.27, p<0.001) |

|           |       |             |             |                           |                           |
|-----------|-------|-------------|-------------|---------------------------|---------------------------|
| Ethnicity | White | 5135 (71.5) | 2050 (28.5) | -                         | -                         |
|           | Asian | 139 (83.2)  | 28 (16.8)   | 0.50 (0.33-0.75, p=0.001) | 0.49 (0.32-0.72, p=0.001) |
|           | Black | 189 (73.8)  | 67 (26.2)   | 0.89 (0.66-1.17, p=0.411) | 0.78 (0.58-1.04, p=0.097) |
|           | Other | 82 (76.6)   | 25 (23.4)   | 0.76 (0.48-1.18, p=0.241) | 0.74 (0.46-1.16, p=0.205) |

**Supplementary Figure S1: Age-sex standardised prevalence (%) of the most common long-term conditions in Incident and People Living with and Beyond Cancer\***

Age-sex standardised prevalence

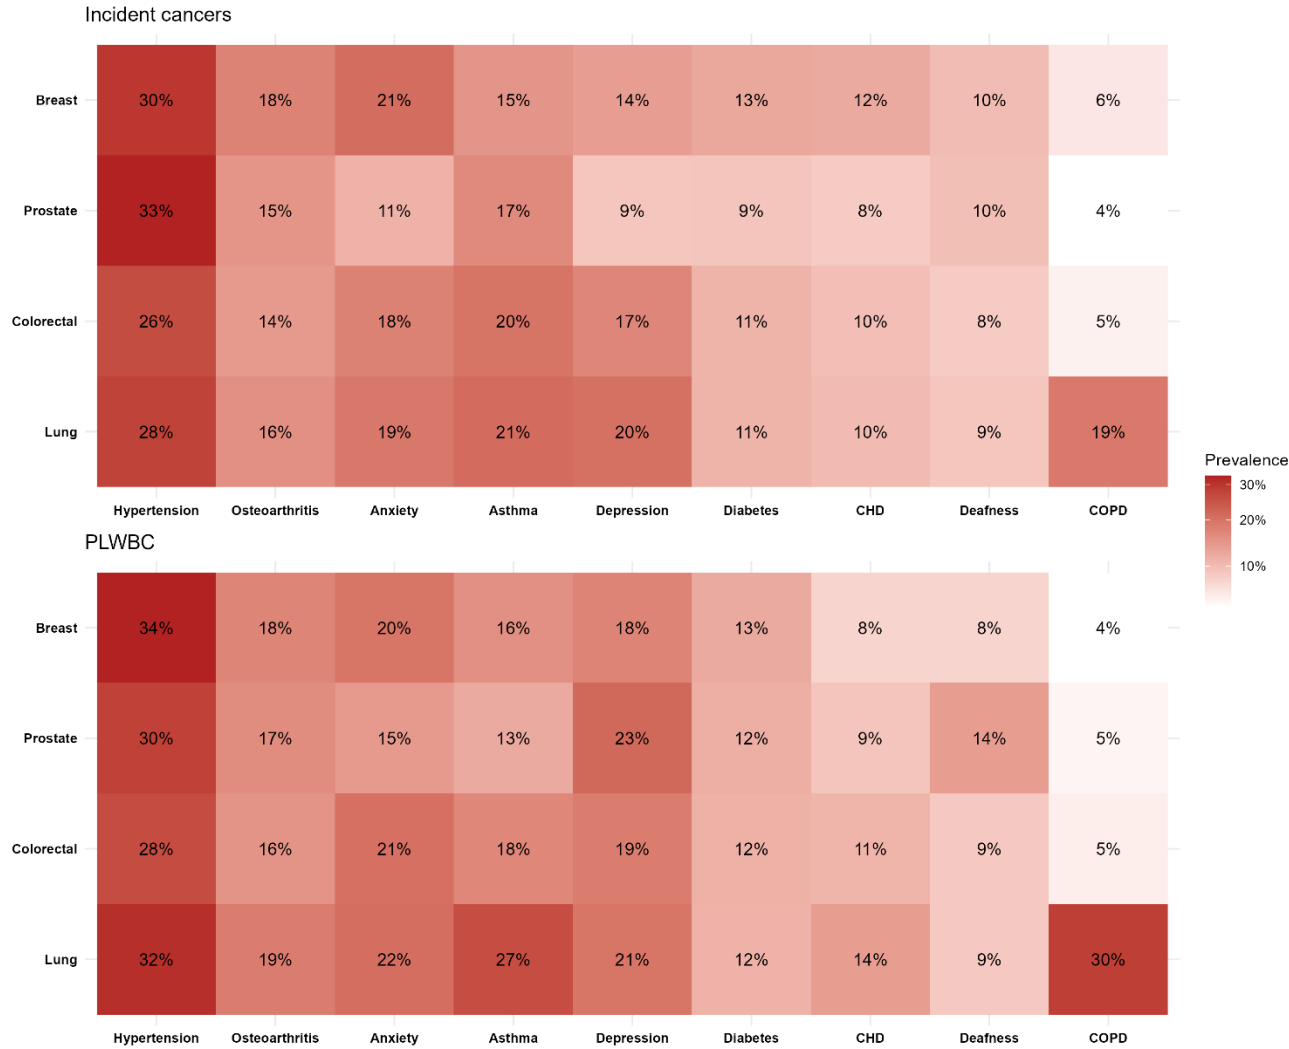

CHD: coronary heart disease; COPD: chronic obstructive pulmonary disease \* Listed conditions are those which are one of the five most prevalent for one or more of the four cancers

**Supplementary Figure S2: Prevalence of mental-physical multimorbidity in the most and least deprived quintiles across age categories**

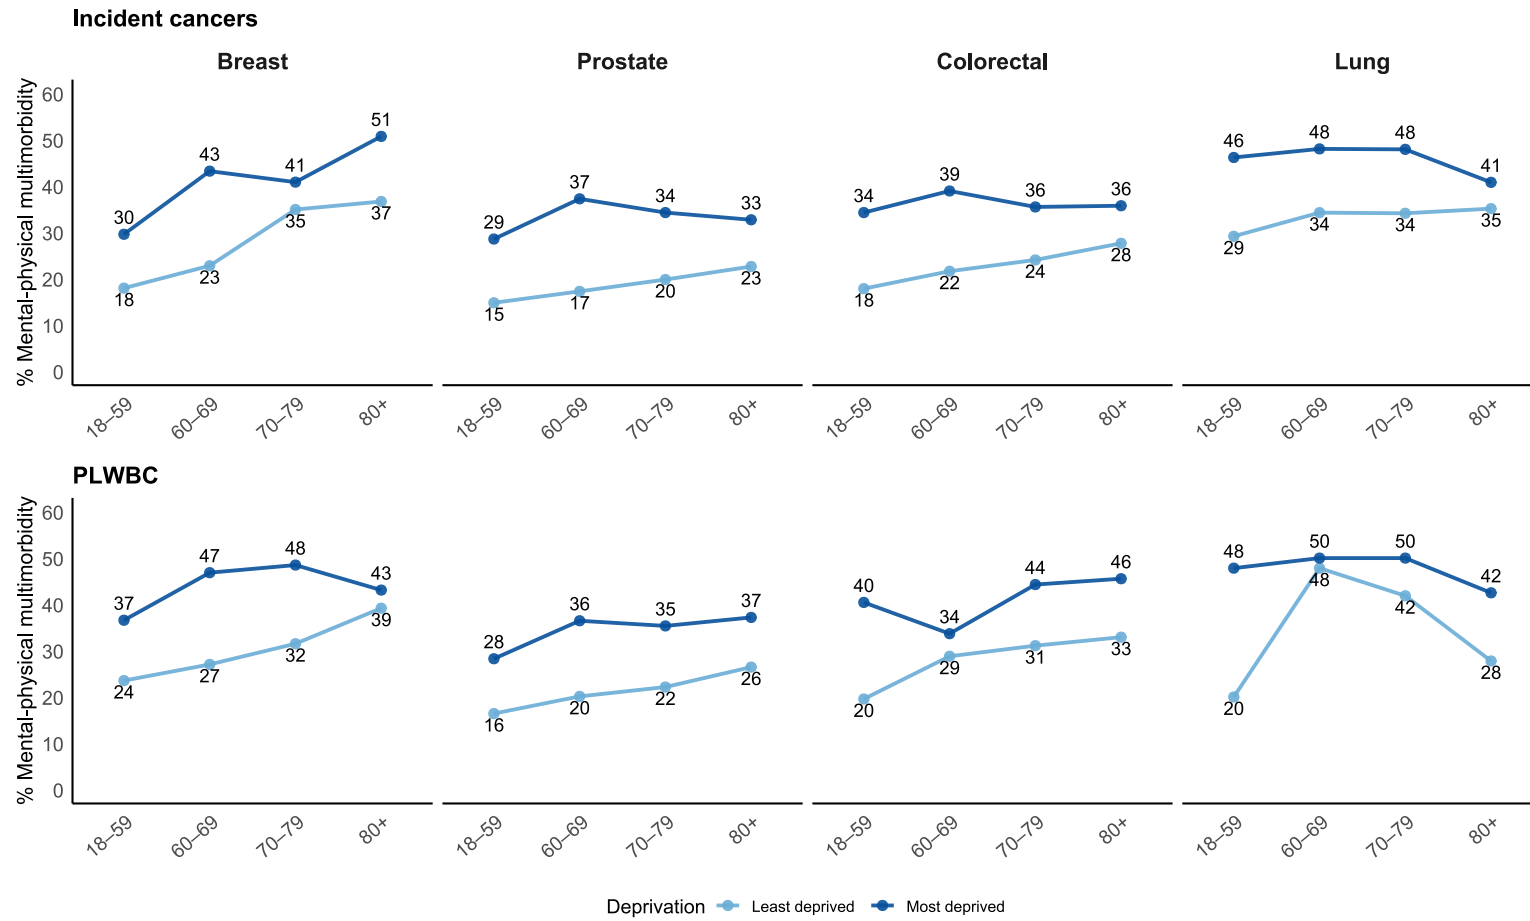

Supplement: Supplementary file 1 [file af80d84d0f52d61e551b1f84.pdf]
